# Supplementary material for: Electrophysiological engineering of heart-derived cells with calcium-dependent potassium channels improves cell therapy efficacy for cardioprotection
Source: PubMed Central journal article supplement (PMC8368210; doi:10.1038/s41467-021-25180-8), 2021-08-16
Supplement: 41467_2021_25180_MOESM1_ESM.pdf [file 41467_2021_25180_MOESM1_ESM.pdf]

## Supplementary Materials for

### **Electrophysiological engineering of heart-derived cells for regenerative-therapy: Calcium-dependent potassium-channels govern cell-therapy efficacy for cardioprotection**

Patrick Vigneault, Sandrine Parent, Pushpinder Kanda, Connor Michie, Darryl R. Davis\*, Stanley Nattel\*

\*Corresponding author. Email: ddavis@ottawaheart.ca (D.R.D.); stanley.nattel@icm-mhi.org (S.N.)

**This PDF file includes:**

#### **SUPPLEMENTARY FIGURES..... p.3**

**Supplementary Fig. 1.** Functional BKCa current in EDCs. a *I-V* relationship of  $I_{BKCa}$  (paxilline-sensitive current) in CD90<sup>+</sup> and CD90<sup>-</sup> EDCs.

**Supplementary Fig. 2.** Effect of *KCNN4* engineering on EDC proliferation.

**Supplementary Fig. 3.** Effect of calcium chelation on KCNN4 mediated increases in proliferation.

**Supplementary Fig. 4.** Effect of *KCNN4* engineering on EDC expression of cell-type selective markers.

**Supplementary Fig. 5.** Group allocation, outcomes and endpoints for the in vivo 4 week study.

**Supplementary Fig. 6.** Hemodynamic effects of transplanting *KCNN4* engineered EDCs.

**Supplementary Fig. 8.** Effect of cell injection on normal heart function. No significant difference was detected.

**Supplementary Fig. 9.** Representative images demonstrating vessel density within the peri-infarct region 4 weeks after LCA ligation.

**Supplementary Fig. 10.** Effect of KCNN4 over-expression on peri-infarct vascularization.

**Supplementary Fig. 11.** Effect of KCNN4 over-expression on pro-healing M2 macrophages.

**Supplementary Fig. 12.** Representative images demonstrating BrdU<sup>+</sup>/DAPI<sup>+</sup> cells within the peri-infarct region 4 weeks after LCA ligation.

**Supplementary Fig. 13.** Effect of KCNN4 over-expression on markers of apoptosis.

**Supplementary Fig. 14.** Effect of KCNN4 over-expression on cardiac macrophage numbers

**Supplementary Fig. 15.** Effect of KCNN4 over-expression on EDC engraftment.

**Supplementary Fig. 16.** Electrophysiological effects of EDC or vehicle treatment on mice.

**Supplementary Fig. 17.** In vivo study exploring the impact of KCNN4 over-expression on EDC mediated repair.

**Supplementary Fig. 18.** Group allocation, outcomes and endpoints for in vivo recombination cell product study.

**Supplementary Fig. 19.** In vivo study exploring the impact of KCNN4 over-expression on EDC mediated repair.

**Supplementary Fig. 20.** KEGG pathway analysis for molecular pathways predicted to be affected by miRNAs altered by *KCNN4* overexpression

**SUPPLEMENTARY TABLES..... p.25**

**Supplementary Table 1.** Clinical characteristics of atrial appendage donors used to obtain EDCs.

**Supplementary Table 2.** Echocardiographic measures of left ventricular function.

**Supplementary Table 3.** Invasive hemodynamic measures of left ventricular function.

**Supplementary Table 4.** Echocardiographic measures of left ventricular function examining the long-term durability of cell transplantation on heart function.

**Supplementary Table 5.** Echocardiographic measures of left ventricular function examining the effect of cell injection on normal heart function.

**Supplementary Table 6.** Effect of *KCNN4* overexpression on electrophysiological parameters.

**Supplementary Table 7.** Echocardiographic measures of left ventricular function examining the impact of KCNN4 over-expression on EDC mediated repair.

**Supplementary Table 8.** Top 10 miRNAs within adherent explant-derived cell extracellular vesicles involved with cardiomyocyte proliferation, salvage, and modulating cardiac fibrosis.

**Supplementary Table 9.** Effect of *KCNN4* overexpression on the miRNA profile within extracellular vesicles compared to non-transduced explant-derived cells.

**Supplementary Table 10.** Effect of *KCNN4* overexpression on the miRNA profile within extracellular vesicles compared to empty vector explant-derived cells.

**SUPPLEMENTARY REFERENCES..... p.38**

SUPPLEMENTARY FIGURES

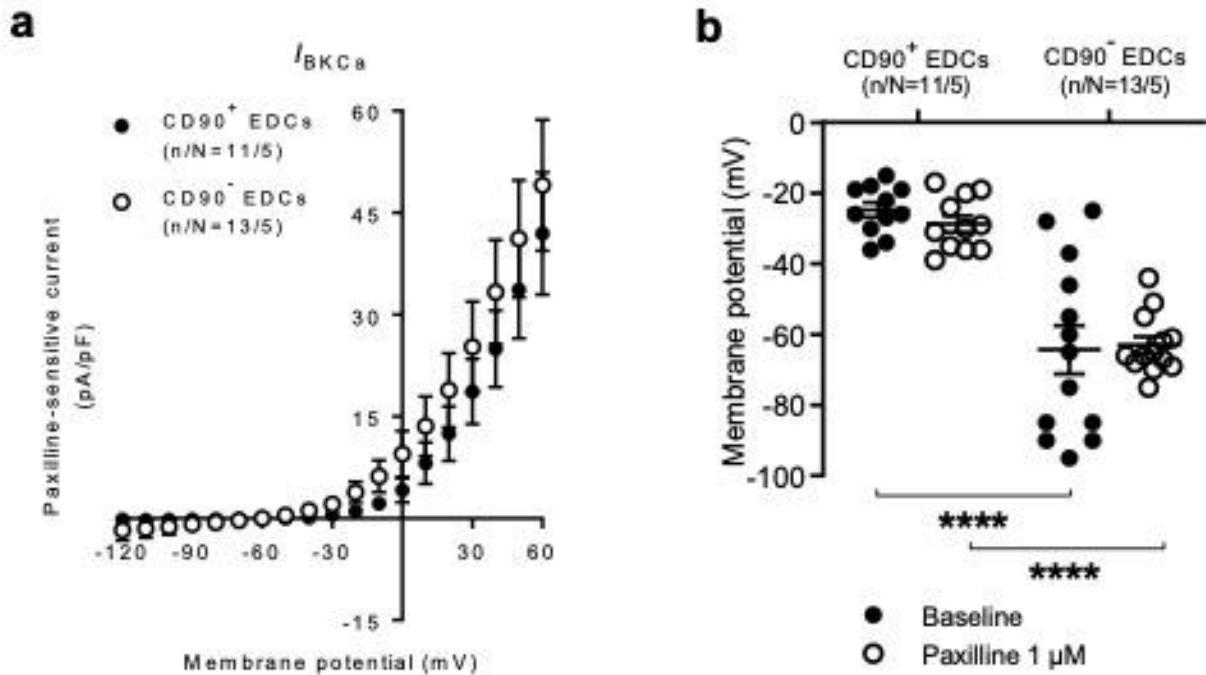

**Supplementary Fig. 1.** Functional BKCa current in EDCs. **a.** *I-V* relationship of  $I_{BKCa}$  (paxilline-sensitive current) in CD90<sup>+</sup> and CD90<sup>-</sup> EDCs. **b.** Resting potential of EDCs before and after exposure to 1- $\mu$ mol/L paxilline. Data are shown as individual data points from biologically-independent experiments, as well as mean and SEM. Two-way repeated-measures ANOVA with individual-mean comparisons by Bonferroni-corrected t-tests; n/N = cells/cell lines per group. For precise P values, see Supplemental Excel file. \*\*\*\* $P < 0.0001$ .

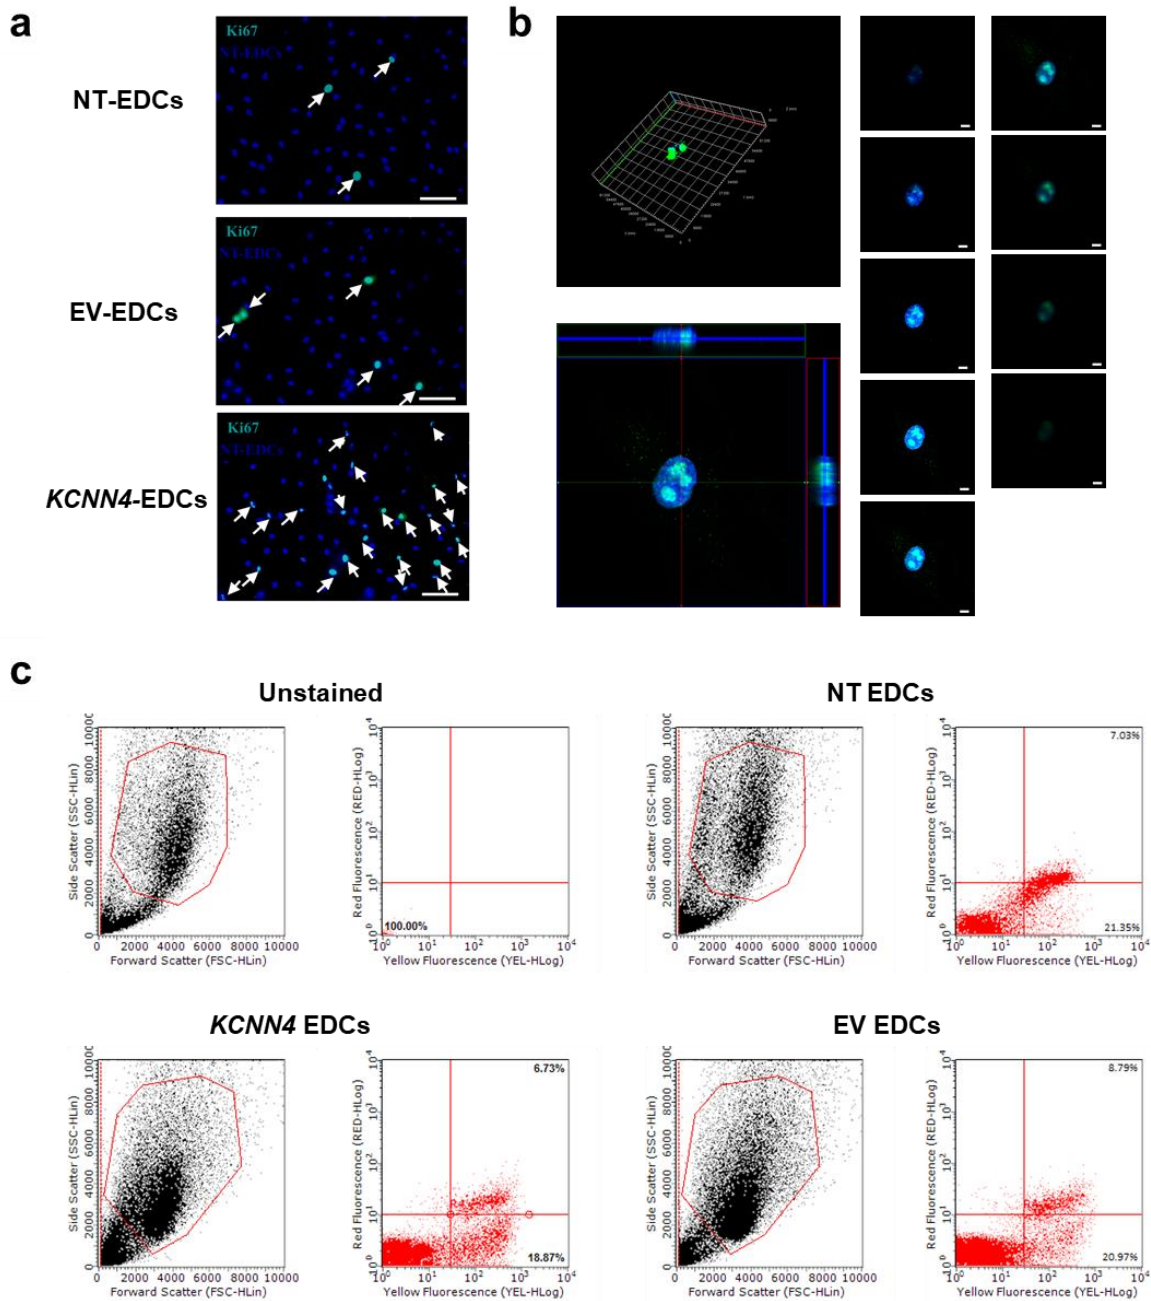

**Supplementary Fig. 2.** Effect of *KCNN4* engineering on EDC proliferation and apoptosis. **a.** Representative images showing the expression of the proliferative marker Ki67. Arrows indicate Ki67<sup>+</sup> cells. Scale bar, 100  $\mu$ m. The experiment was independently repeated in separate biological experiments 5 times for each cell type with similar results. **b.** Representative three-dimensional reconstruction of z-stacked confocal images of EDCs showing DAPI (blue) and Ki-67 (green) (upper panel). Ortho-representation of z-stack confocal microscope images to confirm co-localization of Ki-67 stain (green) within nucleus (DAPI; blue) (lower panel). Nine separate stacked images to show Ki-67 marker (green) localized inside the nucleus of the cell (blue) (right panels). Scale bar, 5  $\mu$ m. DAPI, 4',6-diamidino-2-phenylindole. **c.** Representative images showing the flow cytometry gating strategies used to quantify cells stained with Annexin V-PE (yellow fluorescence, x axis) and cells stained with 7-AAD (red fluorescence, y axis).

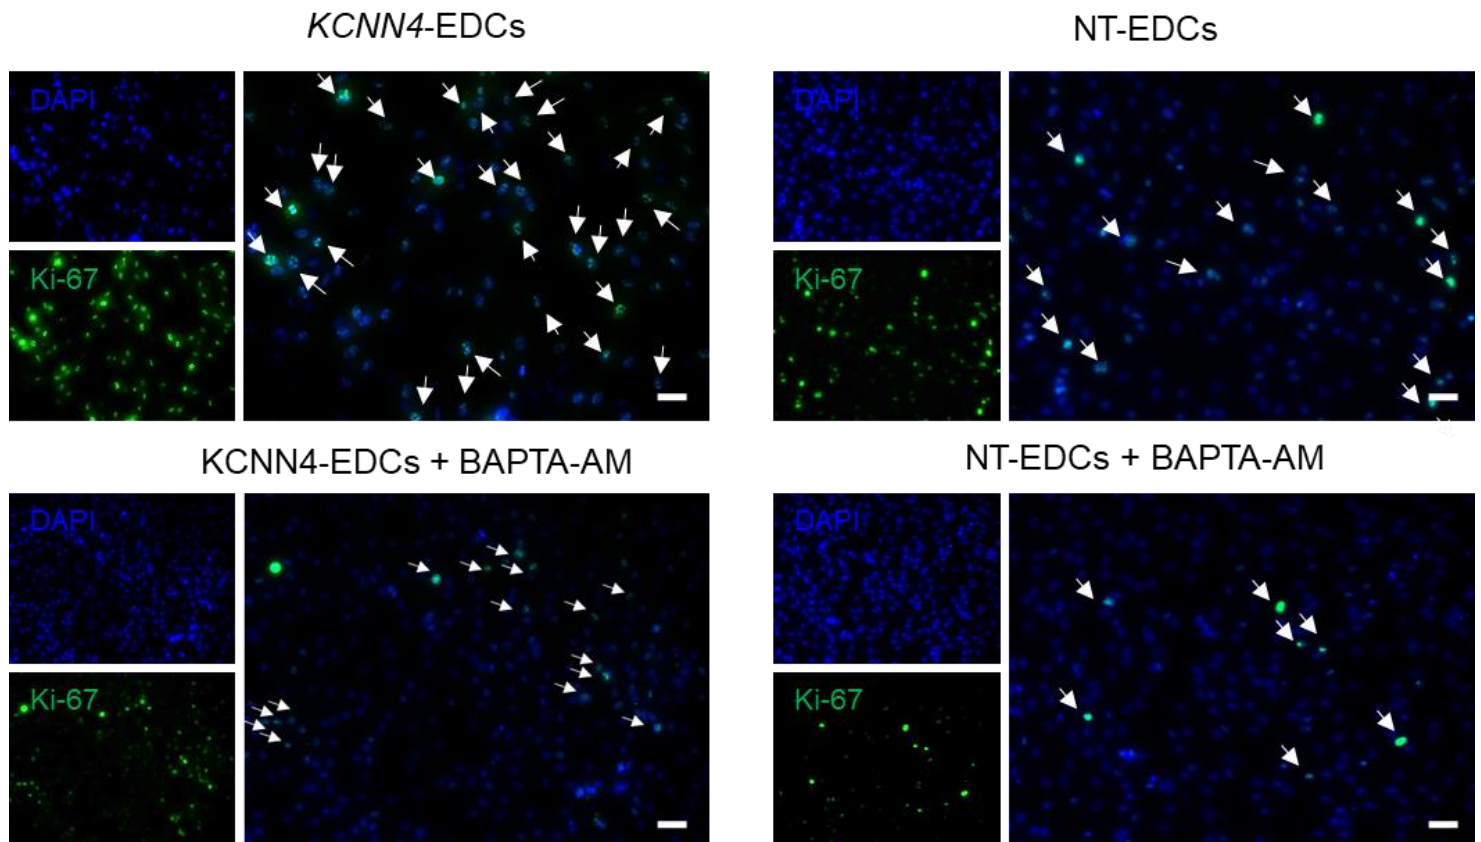

**Supplementary Fig. 3.** Effect of calcium chelation on KCNN4 mediated increases in proliferation. Representative images demonstrating Ki-67 (green) /DAPI (blue) positive cells. Scale bar, 100  $\mu$ m. The experiment was independently repeated in separate biological replicates 5 times for each cell type with similar results. Arrows point to Ki-67+ cells.

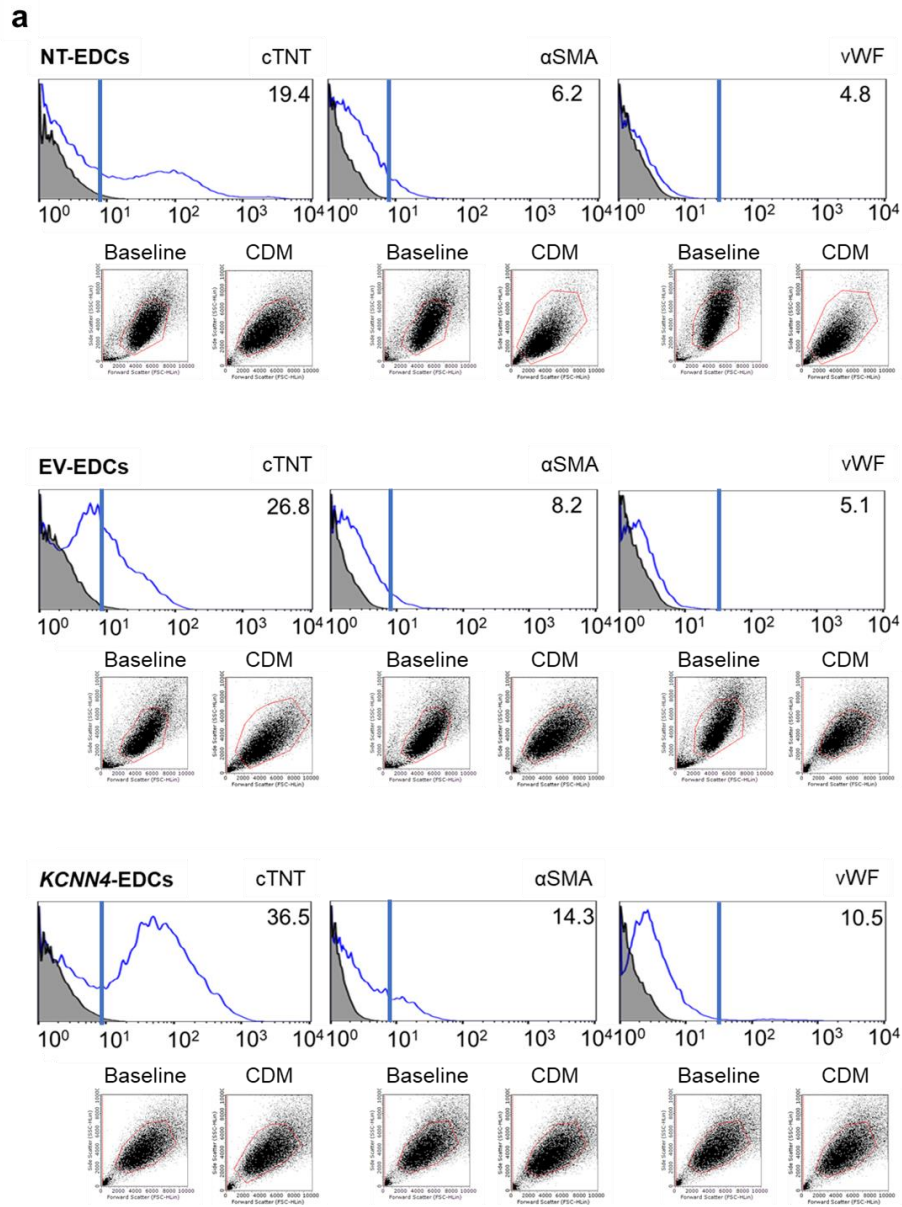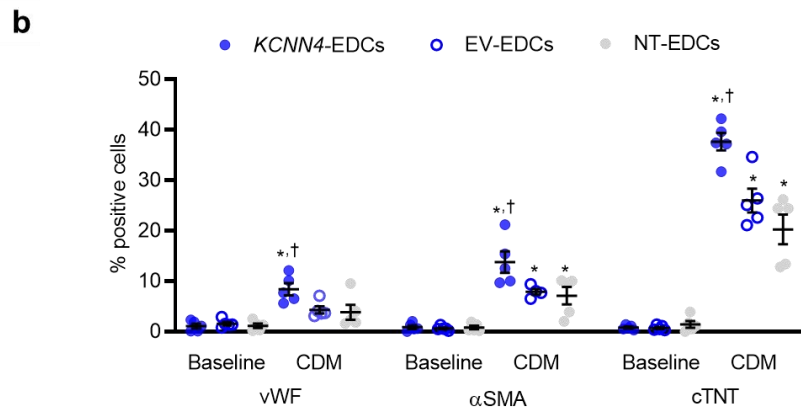

**Supplementary Fig. 4.** Effect of *KCNN4* engineering on EDC expression of cell-type selective markers. **a.** Representative images of flow cytometry plots for cardiac troponin T (cTNT, selectively expressed by cardiomyocytes), alpha smooth muscle actin ( $\alpha$ SMA, typically expressed in vascular smooth-muscle cells) and von Willebrand factor (vWF, expressed in endothelial cells), before and after 1 week of culture of non-transduced (NT)- explant-derived cells (EDCs), empty-virus (EV)-EDCs and *KCNN4*-gene transferred EDCs (*KCNN4*-EDCs) in cardiogenic differentiation media (CDM). **b.** Mean+SEM data demonstrating the effect of *KCNN4* overexpression on the expression pattern of EDCs (n=5 biological repeats for all groups except EV-EDCs treated with cardiogenic media and stained for alpha smooth muscle actin where n = 4). \* $P < 0.05$  vs. baseline. † $P < 0.05$  vs. EV-EDCs and NT-EDCs after 1 week of culture within CDM. For precise P values, see Supplemental Excel file. All data was analyzed using a one-way ANOVA with individual-mean comparisons by Bonferroni multiple two-tailed comparisons test.

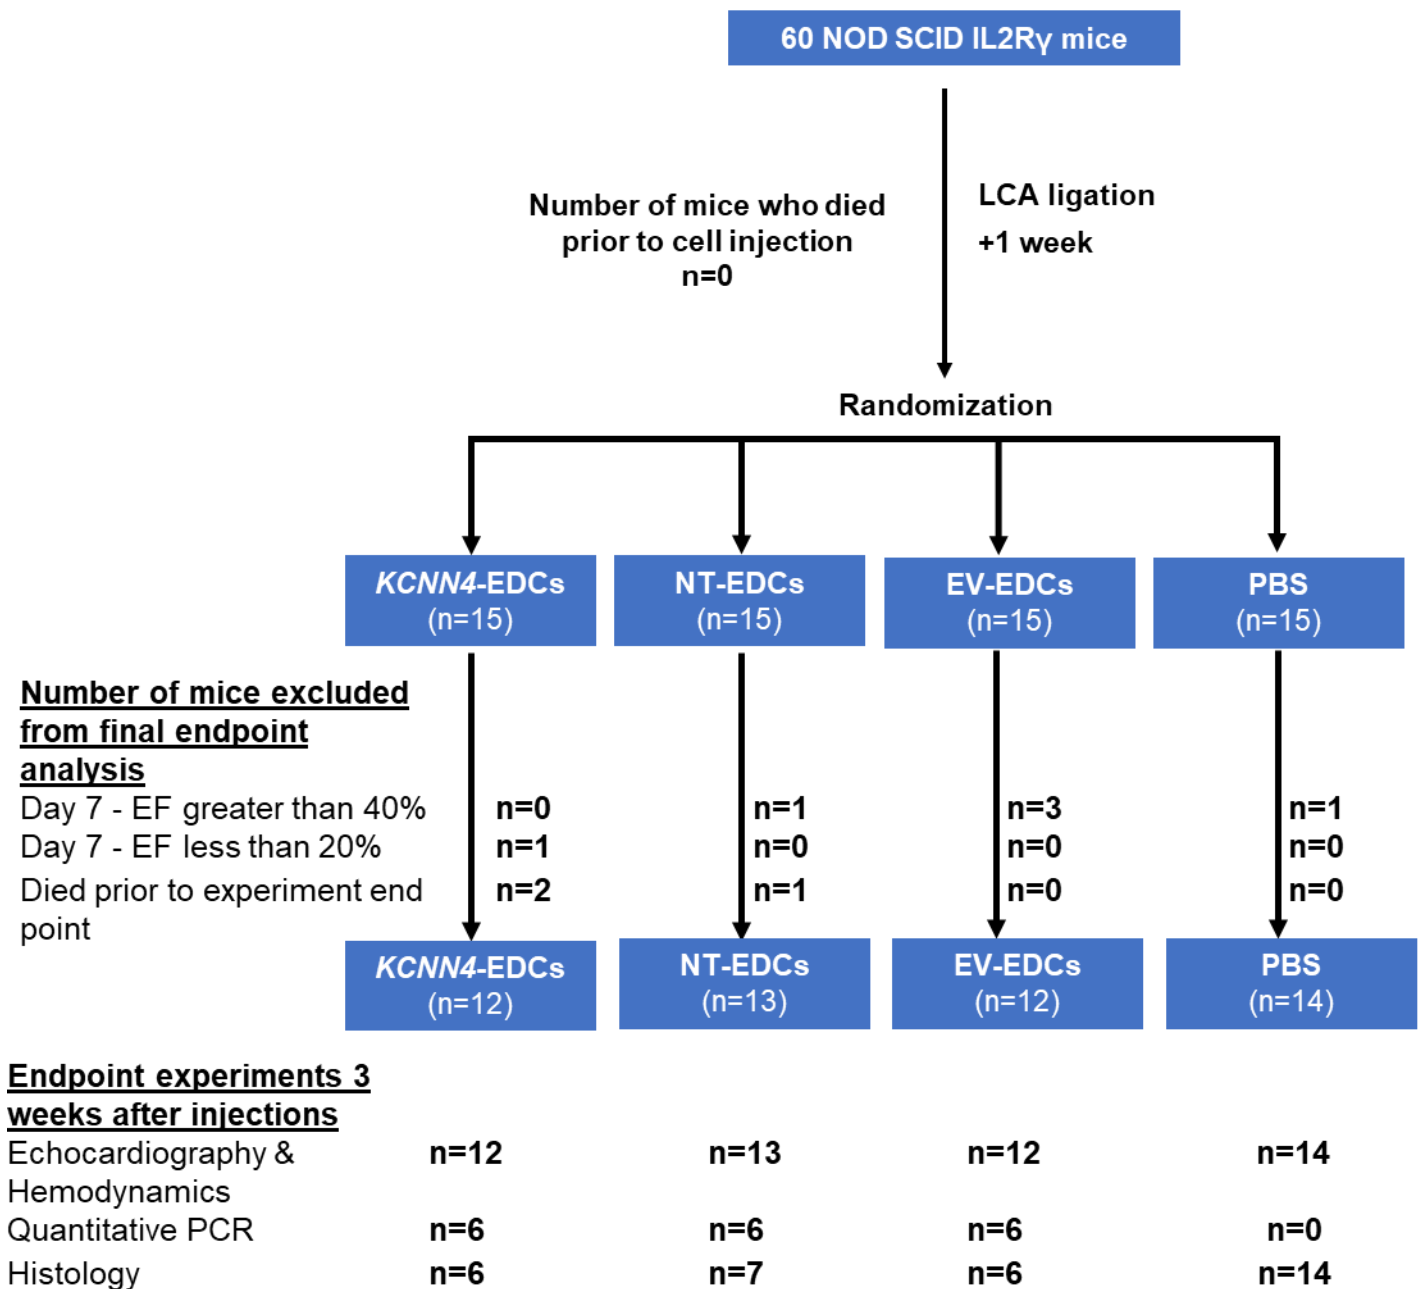

**Supplementary Fig. 5.** Group allocation, outcomes and endpoints for the in vivo 4 week study.



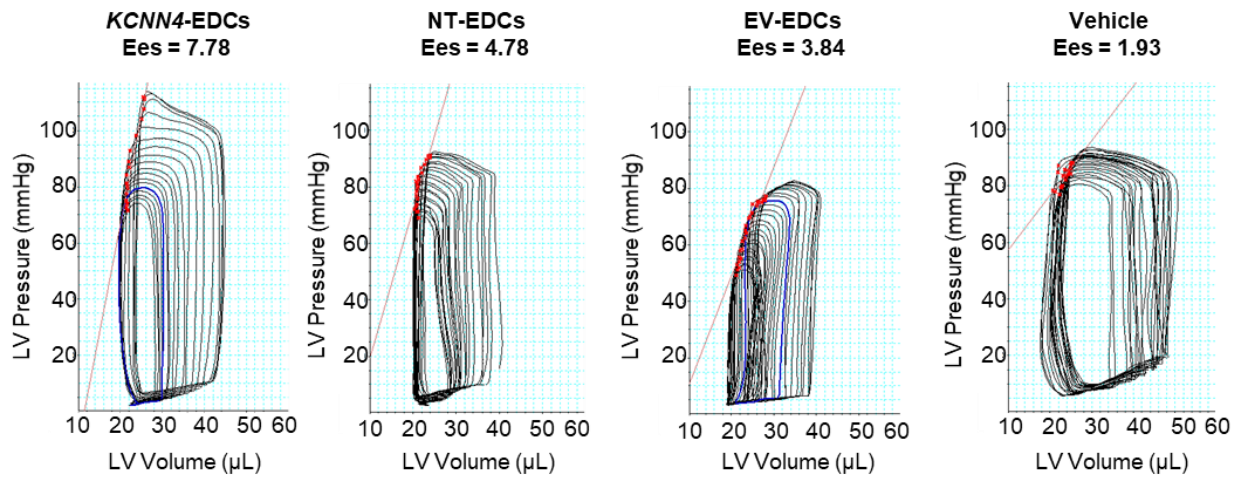

**Supplementary Fig. 6.** Hemodynamic effects of transplanting *KCNN4* engineered EDCs. Representative images of pressure-volume loops generated during IVC compression from mice 3 weeks after receiving *KCNN4*-EDCs, EV-EDCs, NT-EDCs or vehicle. Ees = end-systolic elastance.

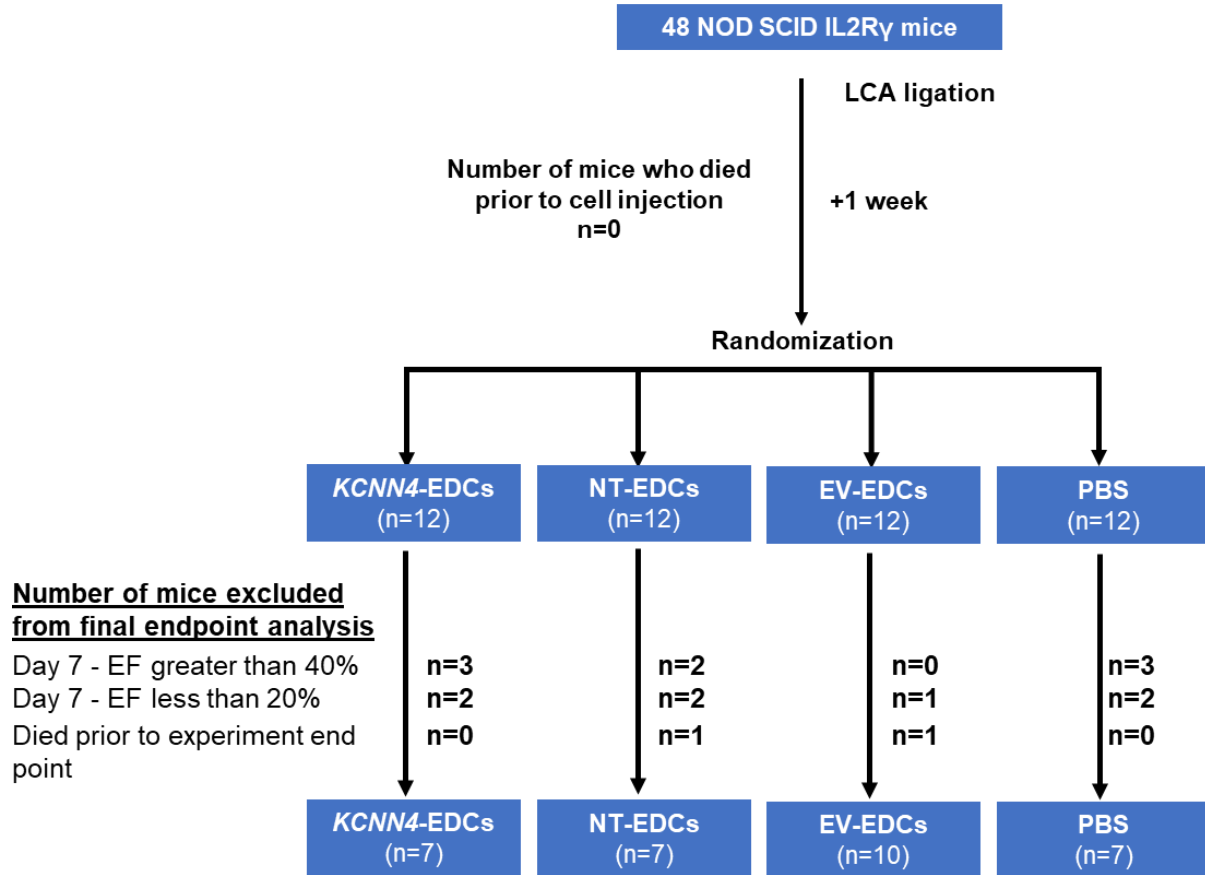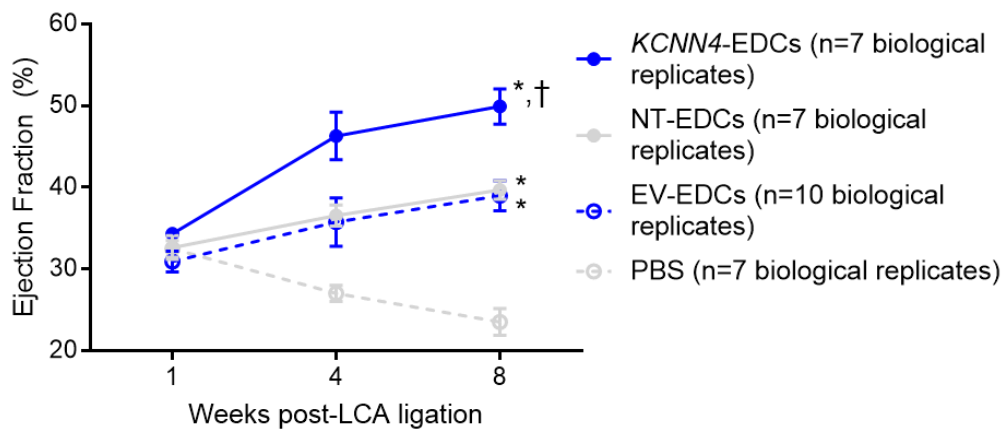

**Supplementary Fig. 7.** Long-term durability of cell transplantation on heart function.  $*P < 0.05$  vs. vehicle treated mice,  $\dagger P < 0.05$  vs. EV- or NT-EDCs treated mice. Data are shown as mean and SEM. For precise P values, see Supplemental Excel file. All data was analyzed using a one-way ANOVA with individual-mean comparisons by Bonferroni multiple comparisons test.

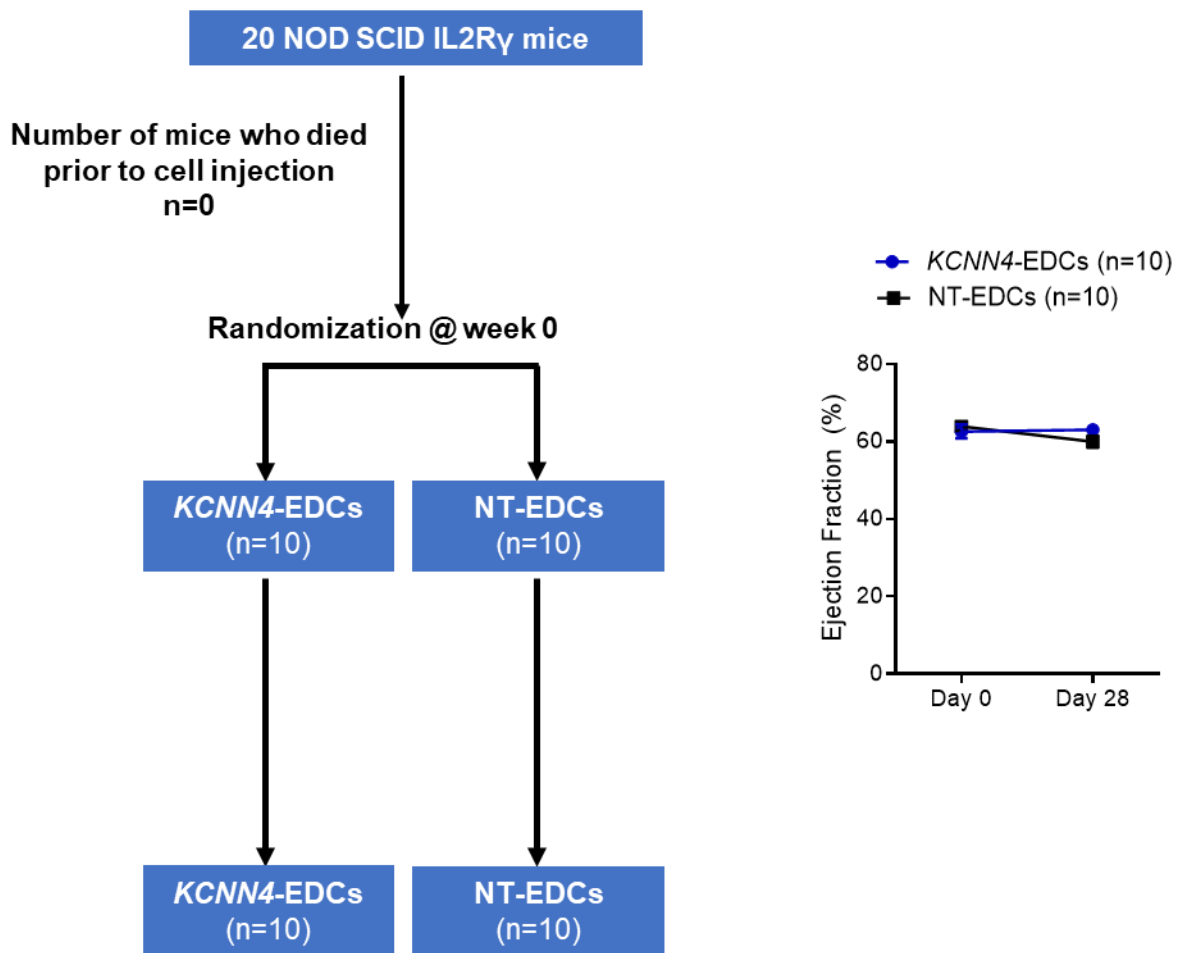

**Supplementary Fig. 8.** Effect of cell injection on normal heart function. No significant difference was detected.

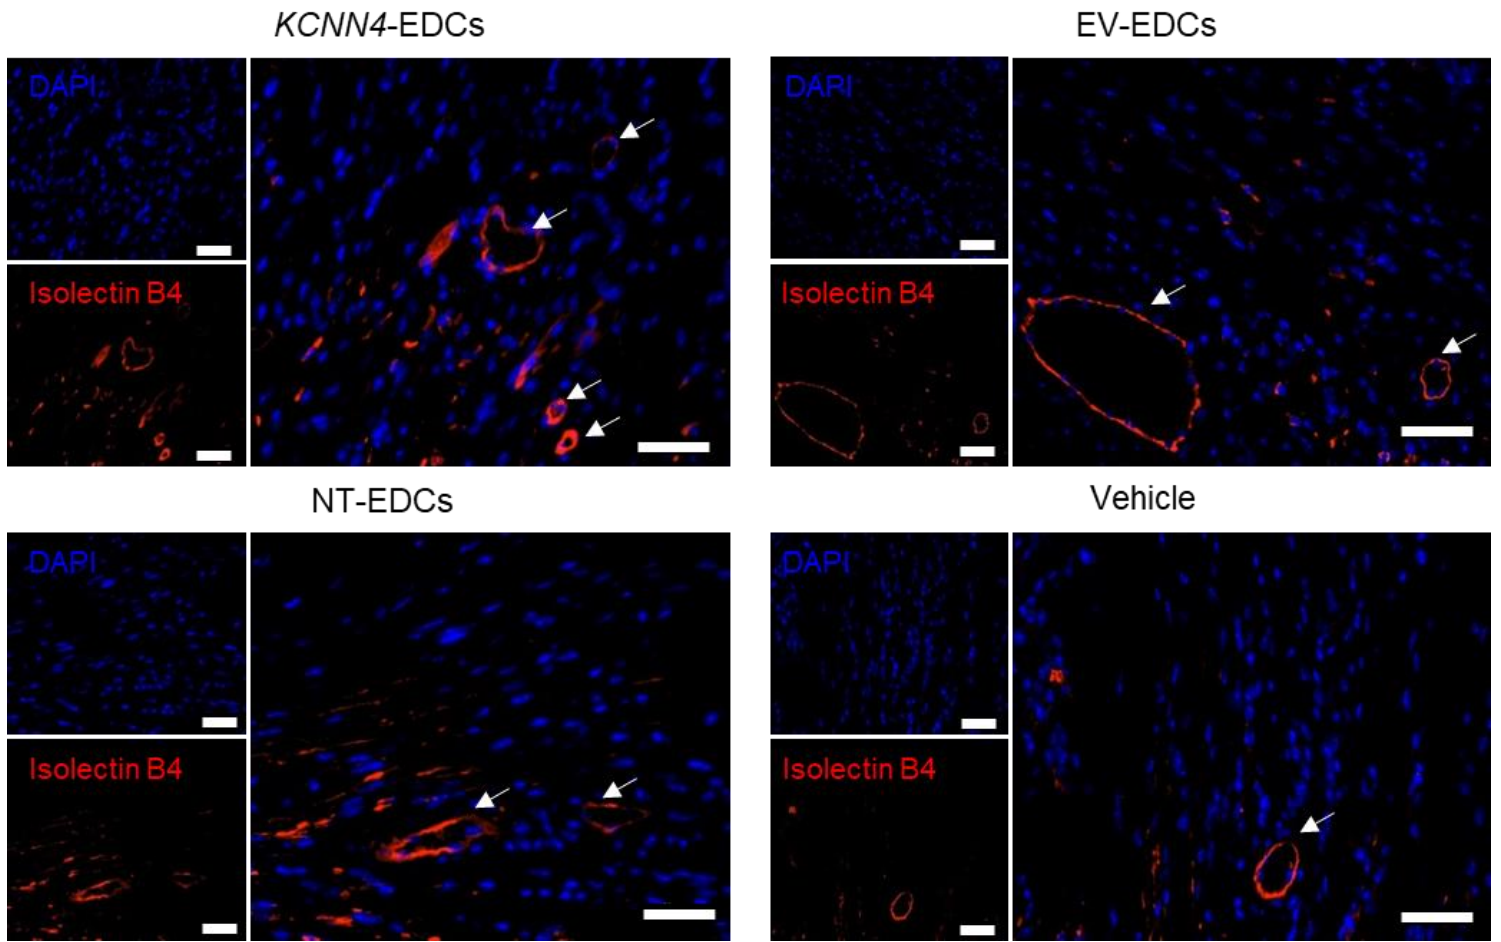

**Supplementary Fig. 9.** Representative images demonstrating vessel density within the peri-infarct region 4 weeks after LCA ligation. Vessels are denoted with a white arrow. Scale bar, 50  $\mu$ m. The experiment was independently repeated in separate biological replicates 5 times for each cell type with similar results.

**a**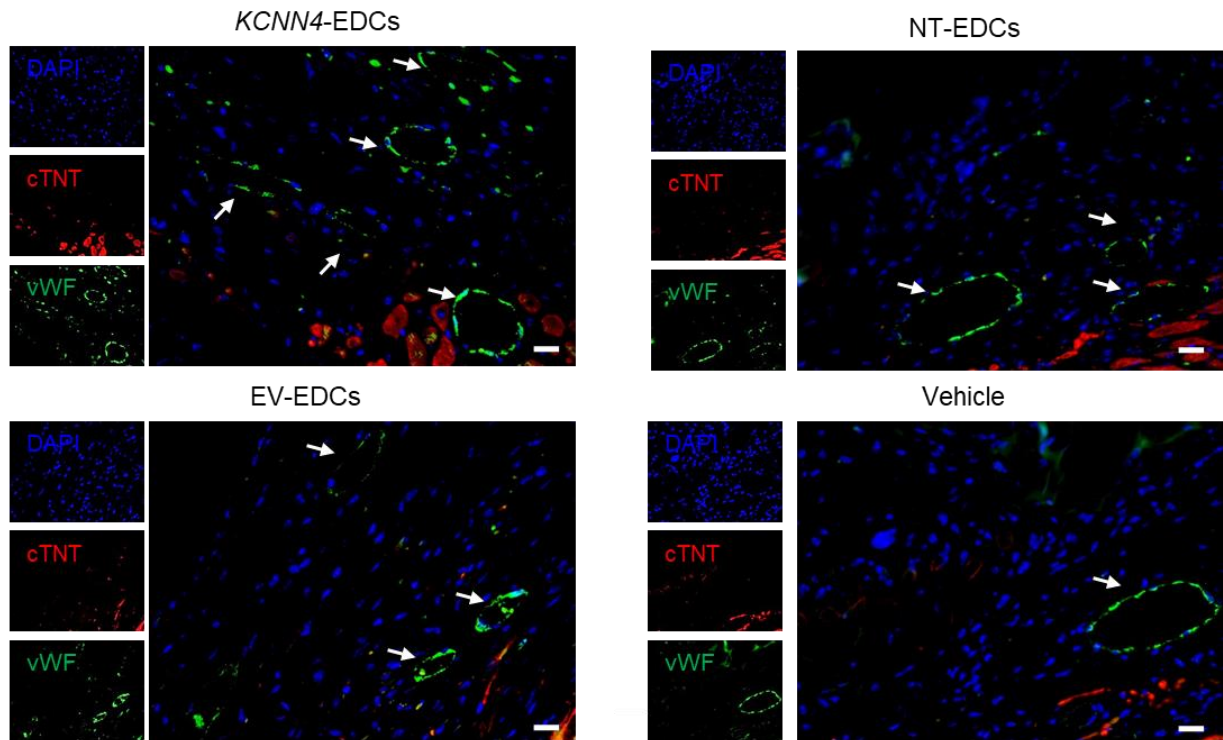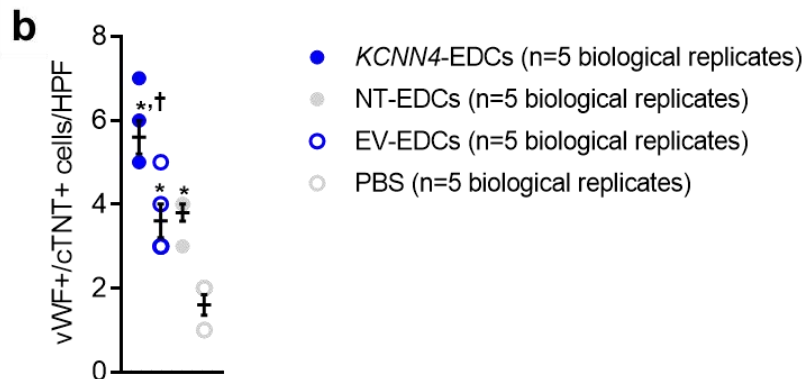

**Supplementary Fig. 10.** Effect of KCNN4 over-expression on peri-infarct vascularization. **a.** Representative images demonstrating vWF+/cTNT+ vessel density within the peri-infarct region 4 weeks after LCA ligation. Vessels are denoted with a white arrow. Scale bar, 50 μm. **b.** Aggregate data showing the effect of KCNN4 over expression on the number of vWF+/cTNT+/DAPI+ cells within the peri-infarct region 4 weeks after LCA ligation (n=5 biological repeats). \* $P < 0.05$  vs. vehicle, † $P < 0.05$  vs. NT-EDCs or EV-EDCs. Data in **b** are shown as individual points, along with mean and SEM. For precise P values, see Supplemental Excel file. All data was analyzed using a one-way ANOVA with individual-mean comparisons by Bonferroni multiple comparisons test.

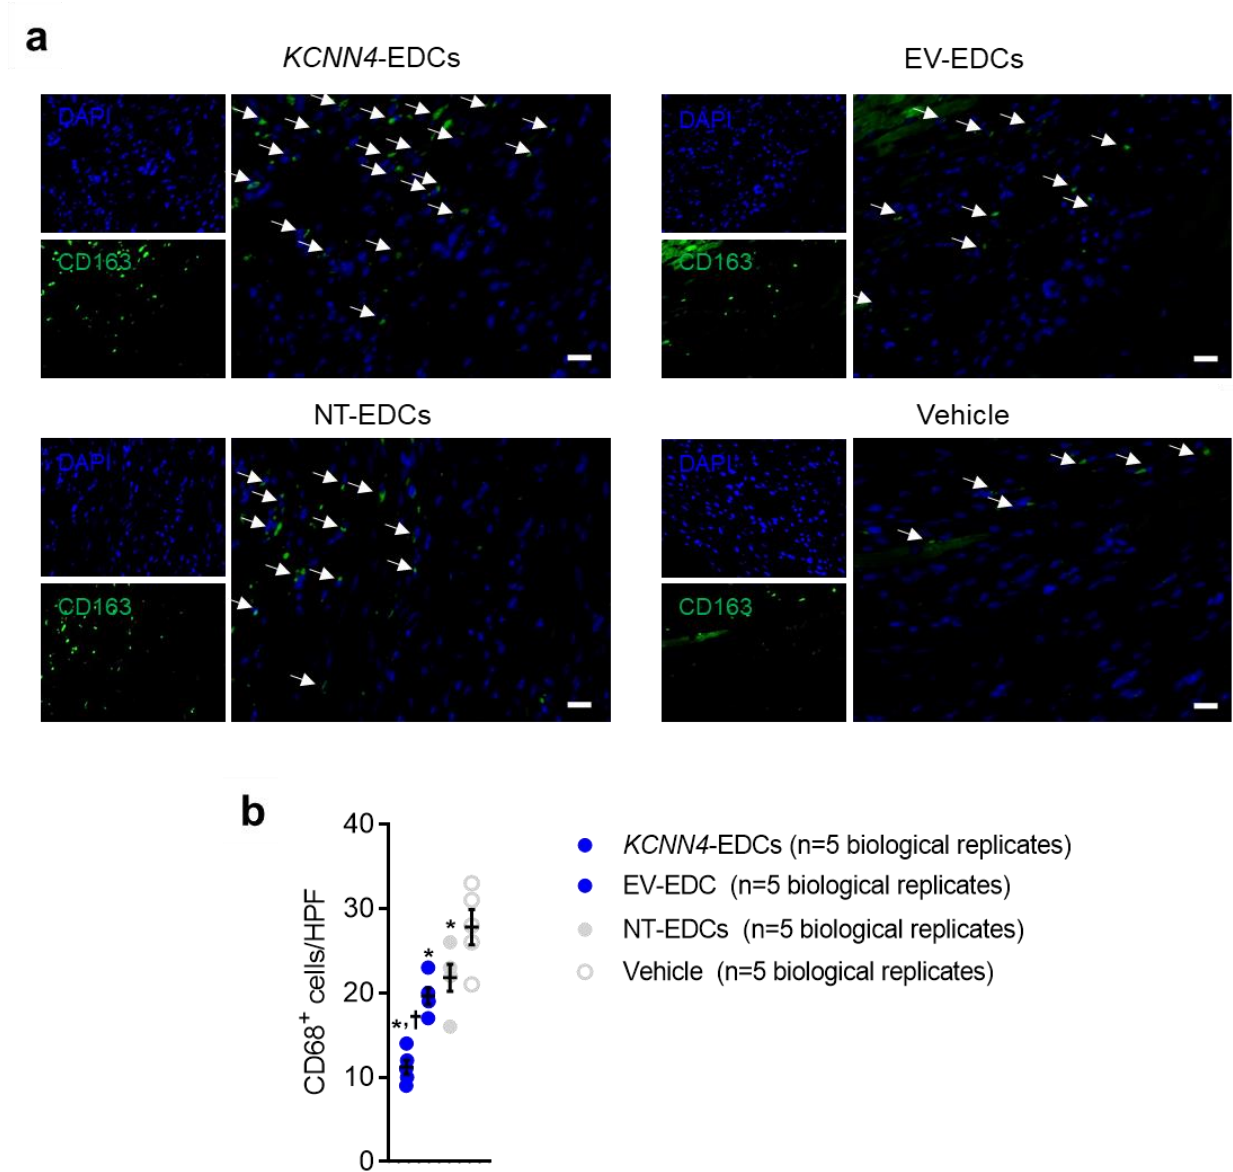

**Supplementary Fig. 11.** Effect of KCNN4 over-expression on pro-healing M2 macrophages. **a.** Representative images demonstrating CD163<sup>+</sup>/DAPI<sup>+</sup> cells within the peri-infarct region 4 weeks after LCA ligation. Scale bar, 50  $\mu$ m. Arrows point to CD163<sup>+</sup> cells. **b.** Aggregate data showing the effect of KCNN4 over expression on the number of CD163<sup>+</sup>/DAPI<sup>+</sup> cells within the peri-infarct region 4 weeks after LCA ligation (n=5 biological repeats). Data in **b** are shown as individual points, along with mean and SEM. \*  $P < 0.05$  vs. vehicle, †  $P < 0.05$  vs. NT-EDCs or EV-EDCs. For precise P values, see Supplemental Excel file. All data was analyzed using a one-way ANOVA with individual-mean comparisons by Bonferroni multiple comparisons test.

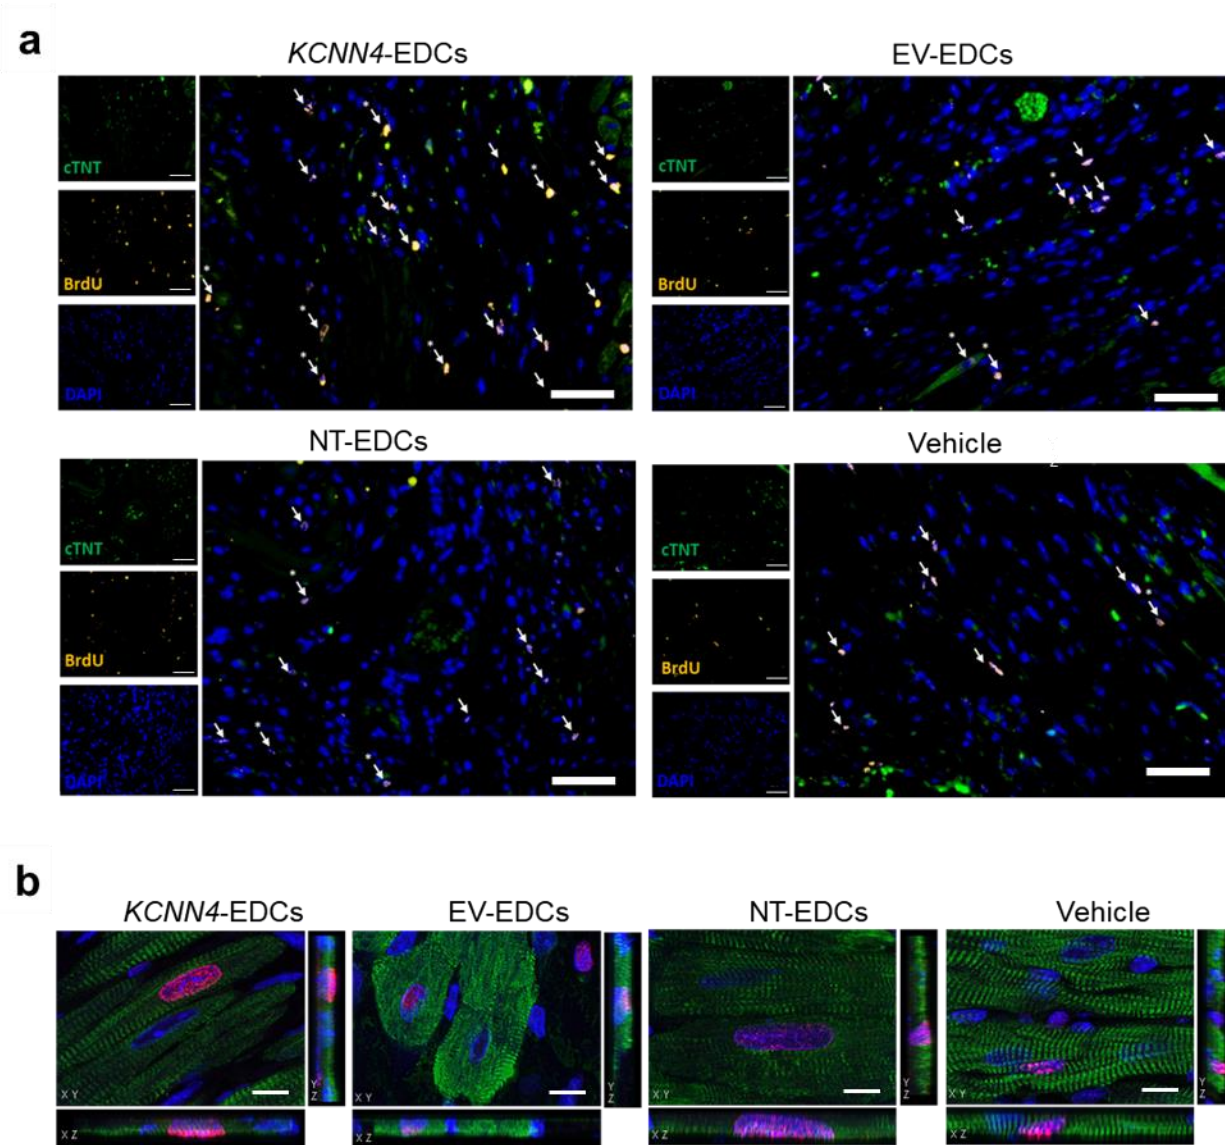

**Supplementary Fig. 12.** Representative images demonstrating BrdU<sup>+</sup>/DAPI<sup>+</sup> cells within the peri-infarct region 4 weeks after LCA ligation. **a.** Cells positive for BrdU (BrdU<sup>+</sup>, suggesting active proliferation) are denoted with a white arrow. Scale bar, 50  $\mu$ m. The experiment was independently repeated in separate biological replicates 5 times for each cell type with similar results. **b.** Representative z-stacks images of BrdU<sup>+</sup> cells demonstrating nuclear localization. The experiment was independently repeated in separate biological replicates a total of 3 times for each cell type with similar results. Scale bar, 10  $\mu$ m.

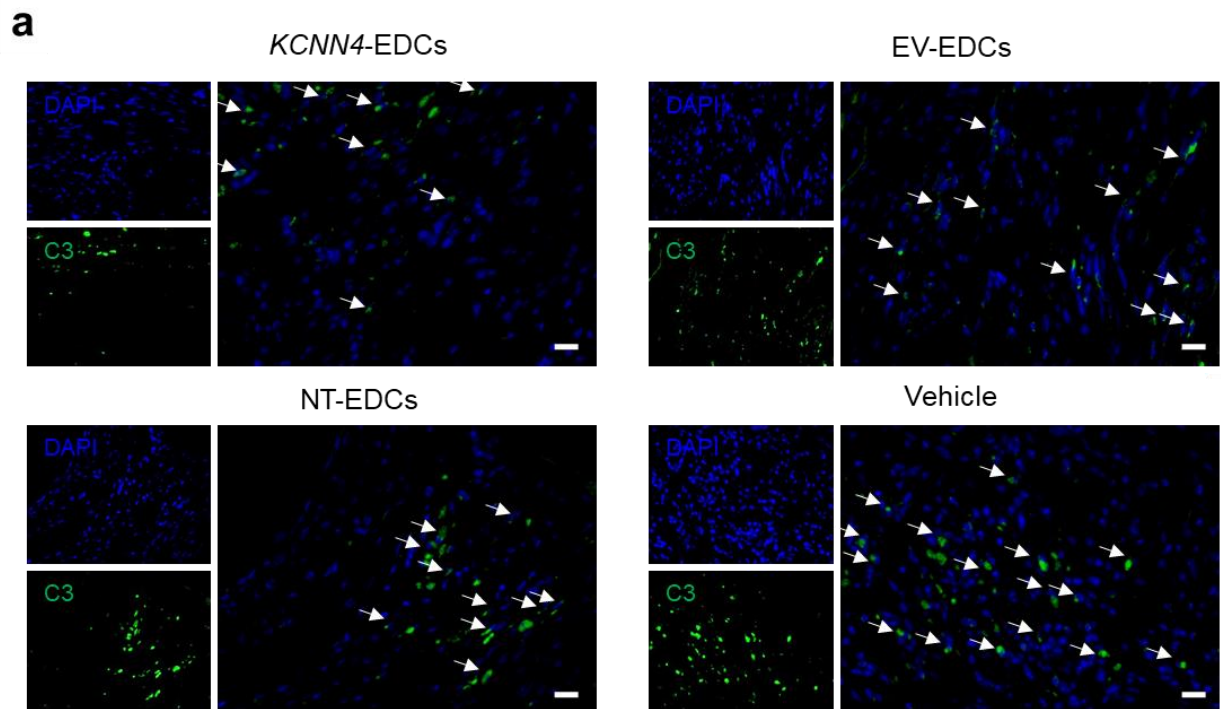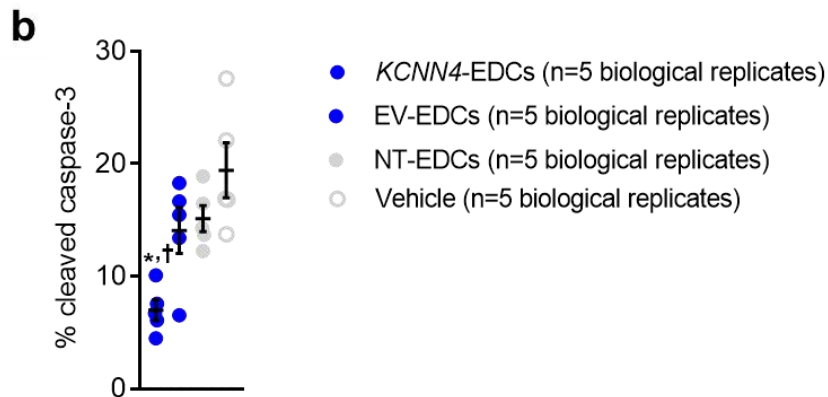

**Supplementary Fig. 13.** Effect of KCNN4 over-expression on markers of apoptosis. **a.** Representative images demonstrating cleaved caspase 3+/DAPI+ cells within the peri-infarct region 4 weeks after LCA ligation. Scale bar, 50  $\mu$ m. Arrows point to cleaved caspase 3+ cells. **b.** Aggregate data showing the effect of KCNN4 over expression on the number of cleaved caspase 3+/DAPI+ cells within the peri-infarct region 4 weeks after LCA ligation (n=5 biological repeats). Data in **b** are shown as individual points, along with mean and SEM. \* $P < 0.05$  vs. vehicle, † $P < 0.05$  vs. NT-EDCs or EV-EDCs. For precise P values, see Supplemental Excel file. All data was analyzed using a one-way ANOVA with individual-mean comparisons by Bonferroni multiple comparisons test.



**a**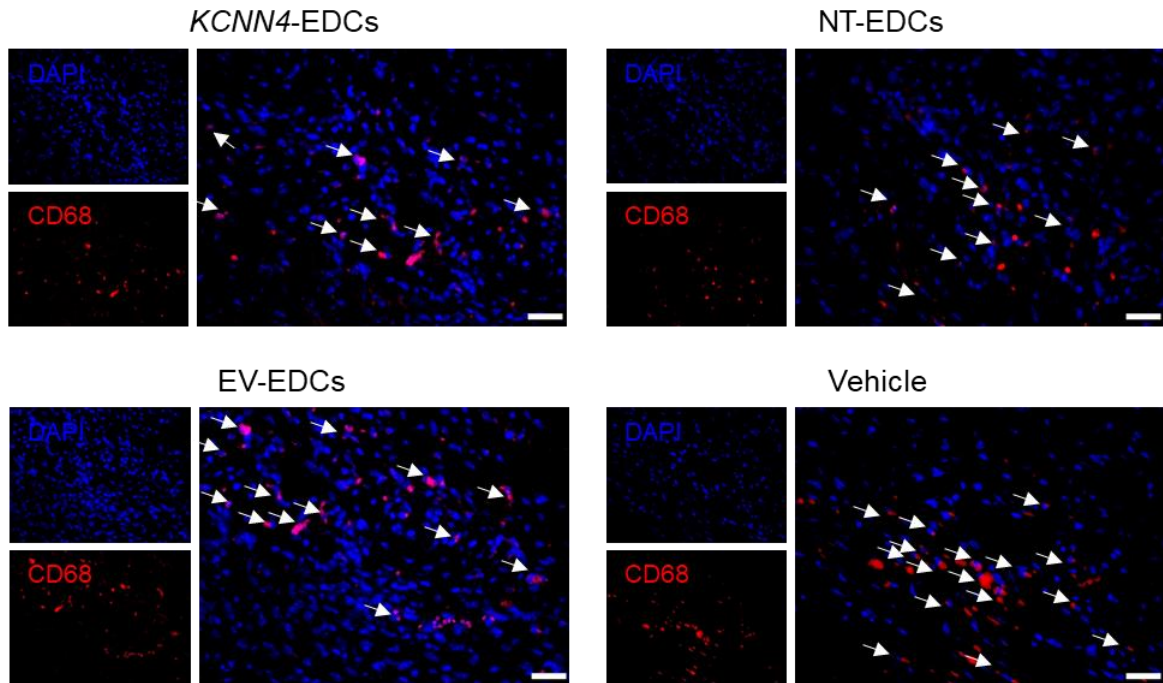**b**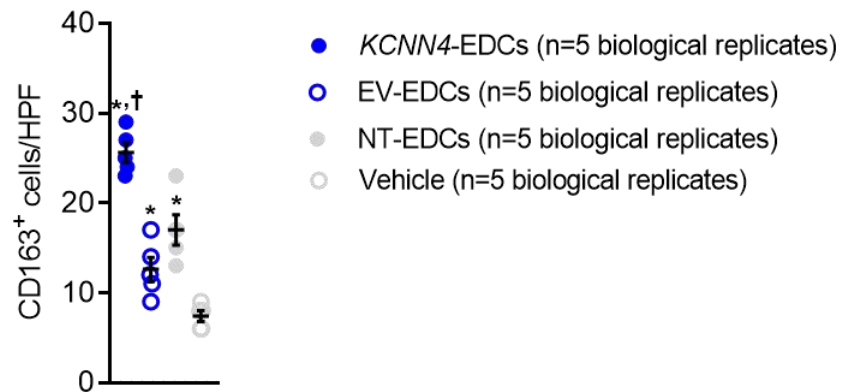

**Supplementary Fig. 14.** Effect of KCNN4 over-expression on cardiac macrophage numbers. **a.** Representative images demonstrating CD68+/DAPI+ cells within the peri-infarct region 4 weeks after LCA ligation. Scale bar, 50  $\mu$ m. Arrows point to CD68+ cells. **b.** Aggregate data showing the effect of KCNN4 over expression on the number of CD68+/DAPI+ cells within the peri-infarct region 4 weeks after LCA ligation (n=5 biological repeats). \* $P < 0.05$  vs. vehicle, † $P < 0.05$  vs. NT-EDCs or EV-EDCs. Data in **b** are shown as individual points, along with mean and SEM. For precise P values, see Supplemental Excel file. All data was analyzed using a one-way ANOVA with individual-mean comparisons by Bonferroni multiple comparisons test.

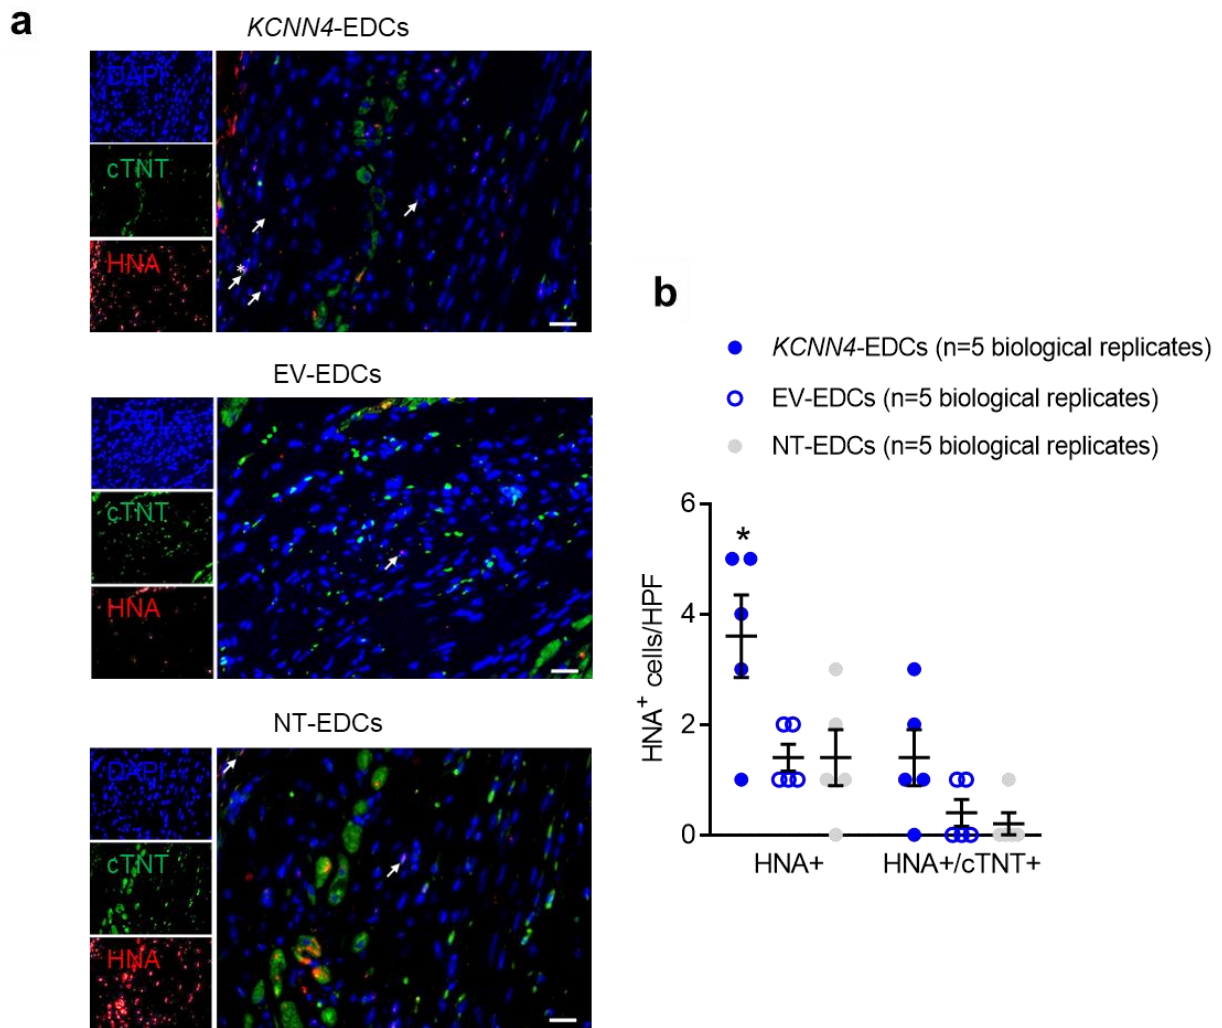

**Supplementary Fig. 15.** Effect of *KCNN4* over-expression on EDC engraftment. **a.** Representative images demonstrating HNA+/cTNT+/DAPI+ cells within the peri-infarct region 4 weeks after LCA ligation. Scale bar, 50  $\mu$ m. Arrows point to HNA positive cells, star points to double HNA and cTNT positive cell. **b.** Aggregate data showing the effect of *KCNN4* over-expression on the number of HNA+/DAPI+ or HNA+/cTNT+/DAPI+ cells within the peri-infarct region 4 weeks after LCA ligation (n=5 biological repeats). Data in **b** are shown as individual points, along with mean and SEM. \* $P < 0.05$  vs. NT-EDCs or EV-EDCs. For precise P values, see Supplemental Excel file. All data was analyzed using a one-way ANOVA with individual-mean comparisons by Bonferroni multiple comparisons test.

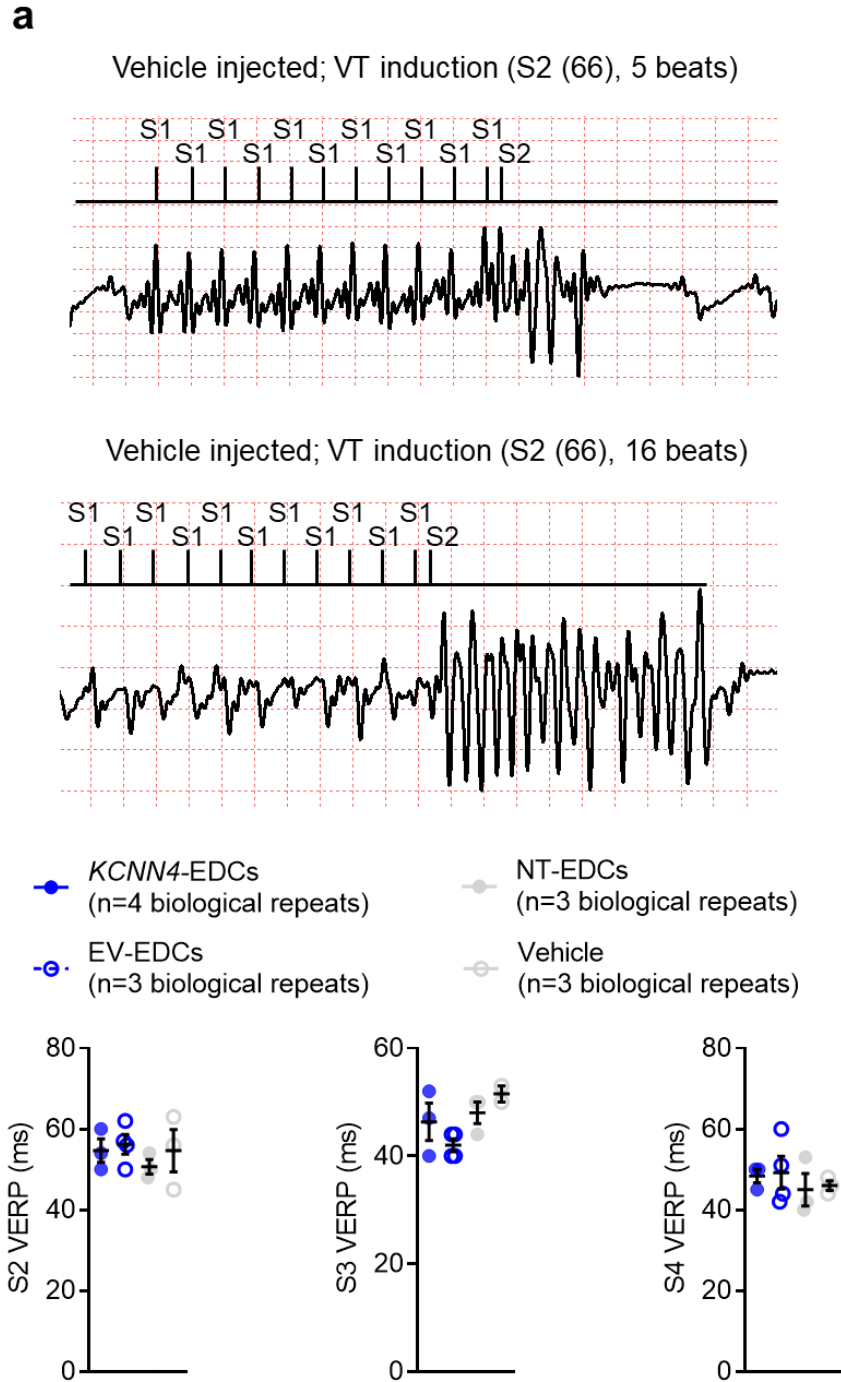

**Supplementary Fig. 16.** Electrophysiological effects of EDC or vehicle treatment on mice. **a.** Telemetry demonstrating induction of ventricular tachycardia in mice treated with vehicle. **b.** Effect of EDC or vehicle treatment on ventricular refractoriness. Data in **b** are shown as individual points, along with mean and SEM. One-way ANOVA with individual-mean comparisons by Bonferroni multiple comparisons test. N=4, 3, 3, 3 independent biological replicates for *KCNN4*-transfected EDCs (explant-derived cells), non-transduced (NT), empty-vector (EV) and vehicle-treated EDCs respectively.

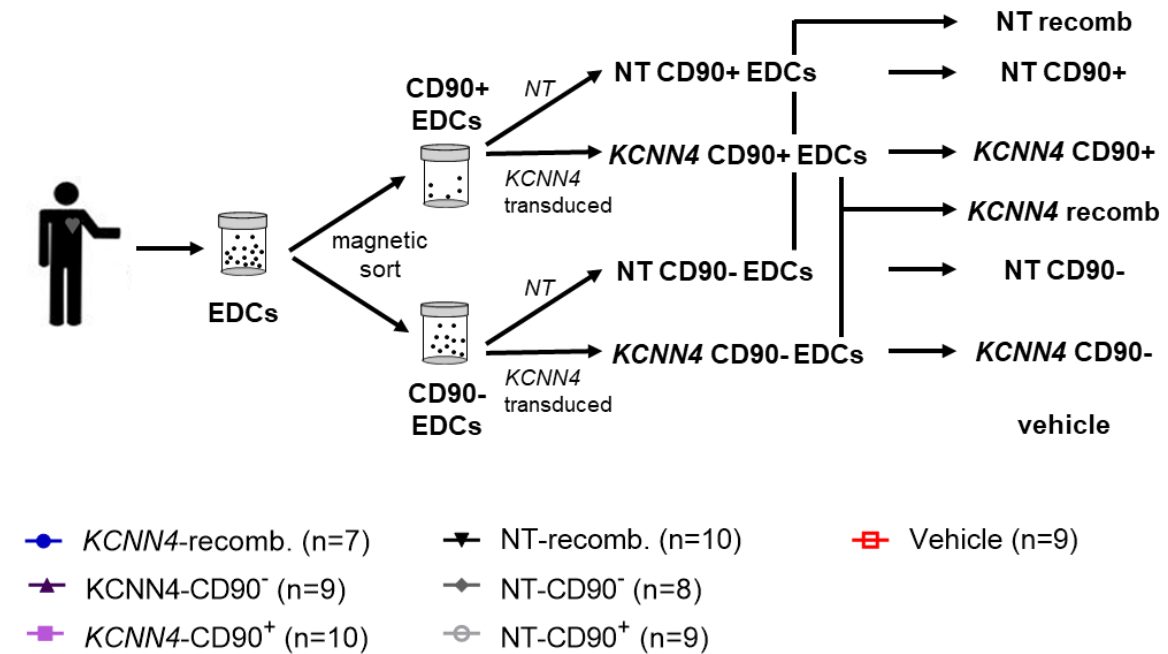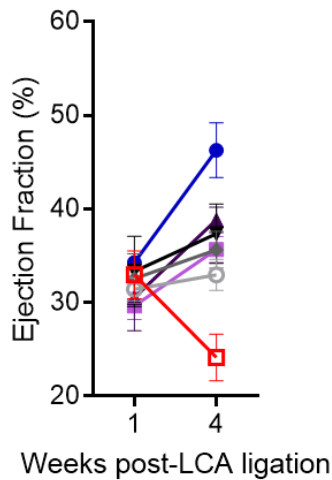

|                                                           | Mean Diff. | 95.00% CI of diff. | Adjusted P Value |
|-----------------------------------------------------------|------------|--------------------|------------------|
| <i>KCNN4</i> -recomb. vs. Vehicle                         | 22.14      | 12.25 to 32.02     | <0.001           |
| <i>KCNN4</i> -CD90 <sup>+</sup> vs. Vehicle               | 11.53      | 2.516 to 20.54     | 0.004            |
| <i>KCNN4</i> -CD90 <sup>-</sup> vs. Vehicle               | 14.69      | 5.443 to 23.93     | <0.001           |
| NT-recomb. vs. Vehicle                                    | 13.23      | 4.218 to 22.24     | <0.001           |
| NT-CD90 <sup>-</sup> vs. Vehicle                          | 11.50      | 1.970 to 21.03     | 0.008            |
| NT-CD90 <sup>+</sup> vs. Vehicle                          | 8.829      | -0.4160 to 18.07   | 0.07             |
| <i>KCNN4</i> -CD90 <sup>+</sup> vs. <i>KCNN4</i> -recomb. | 10.61      | 0.9461 to 20.28    | 0.02             |
| <i>KCNN4</i> -CD90 <sup>-</sup> vs. <i>KCNN4</i> -recomb. | 7.450      | -2.434 to 17.33    | 0.28             |
| NT-recomb. vs. <i>KCNN4</i> -recomb.                      | 8.909      | -0.7559 to 18.57   | 0.09             |
| NT-CD90 <sup>-</sup> vs. <i>KCNN4</i> -recomb.            | 10.64      | 0.4888 to 20.79    | 0.03             |
| NT-CD90 <sup>+</sup> vs. <i>KCNN4</i> -recomb.            | 13.31      | 3.426 to 23.19     | 0.002            |

**Supplementary Fig. 17.** In vivo study exploring the impact of *KCNN4* over-expression on EDC mediated repair. The upper panel illustrates cell culture, magnetic separation, *KCNN4* over-expression and the groups profiled. Lower panel outlines the impact of intramyocardial cell or vehicle injection 4 weeks after LCA ligation on echocardiographic ejection fraction. Data are shown as mean±SEM. One-way ANOVA with individual-mean comparisons by Bonferroni multiple comparisons test.

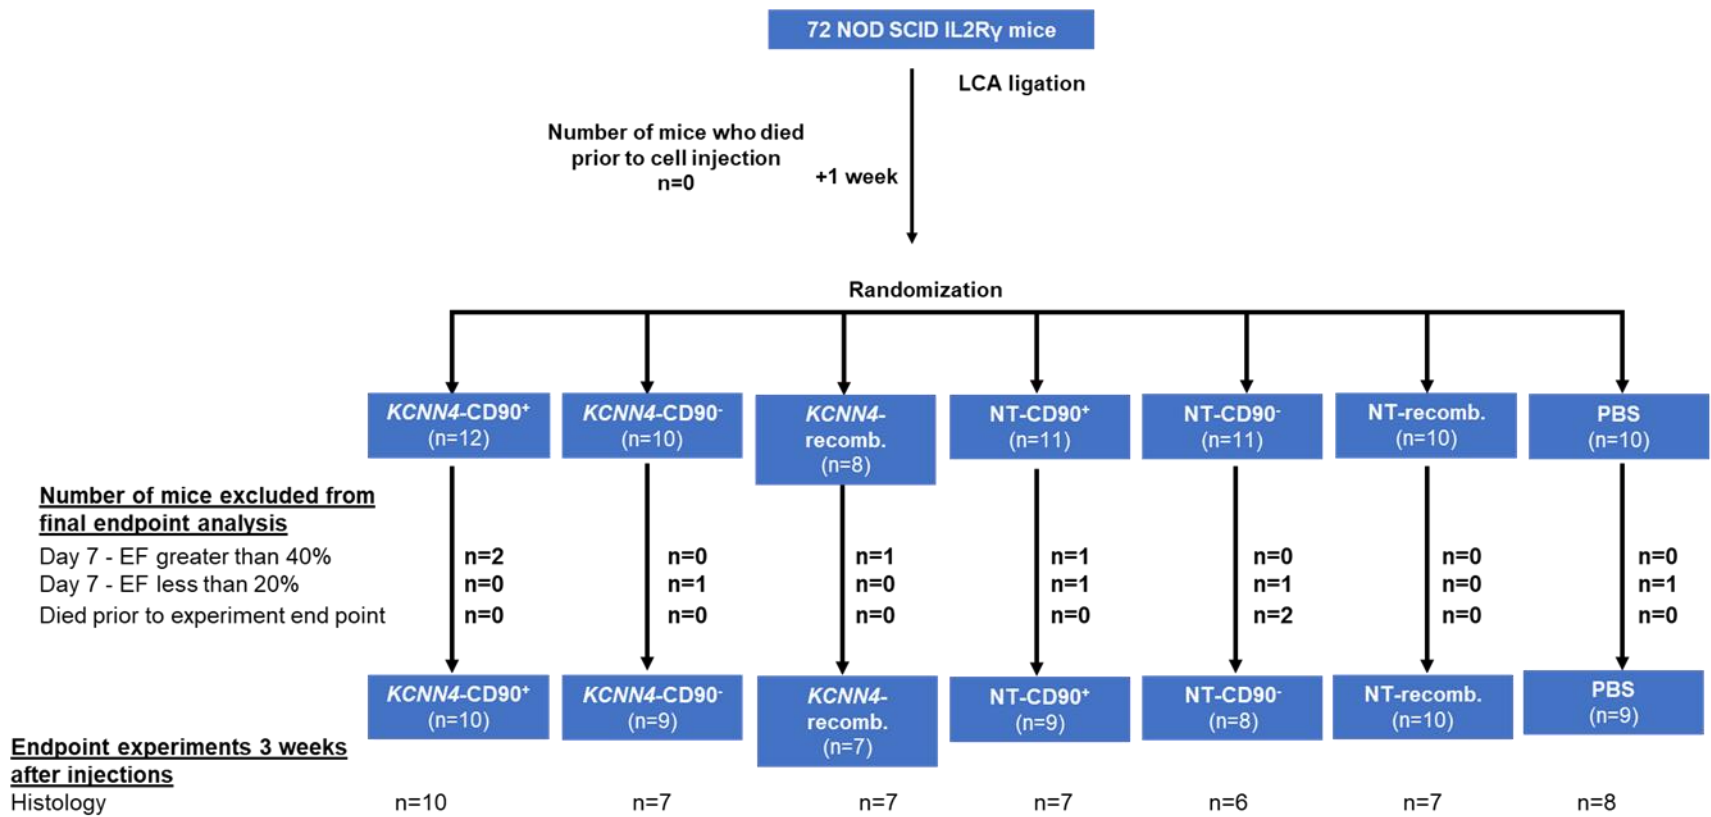

**Supplementary Fig. 18.** Group allocation, outcomes and endpoints for in vivo recombination cell product study.

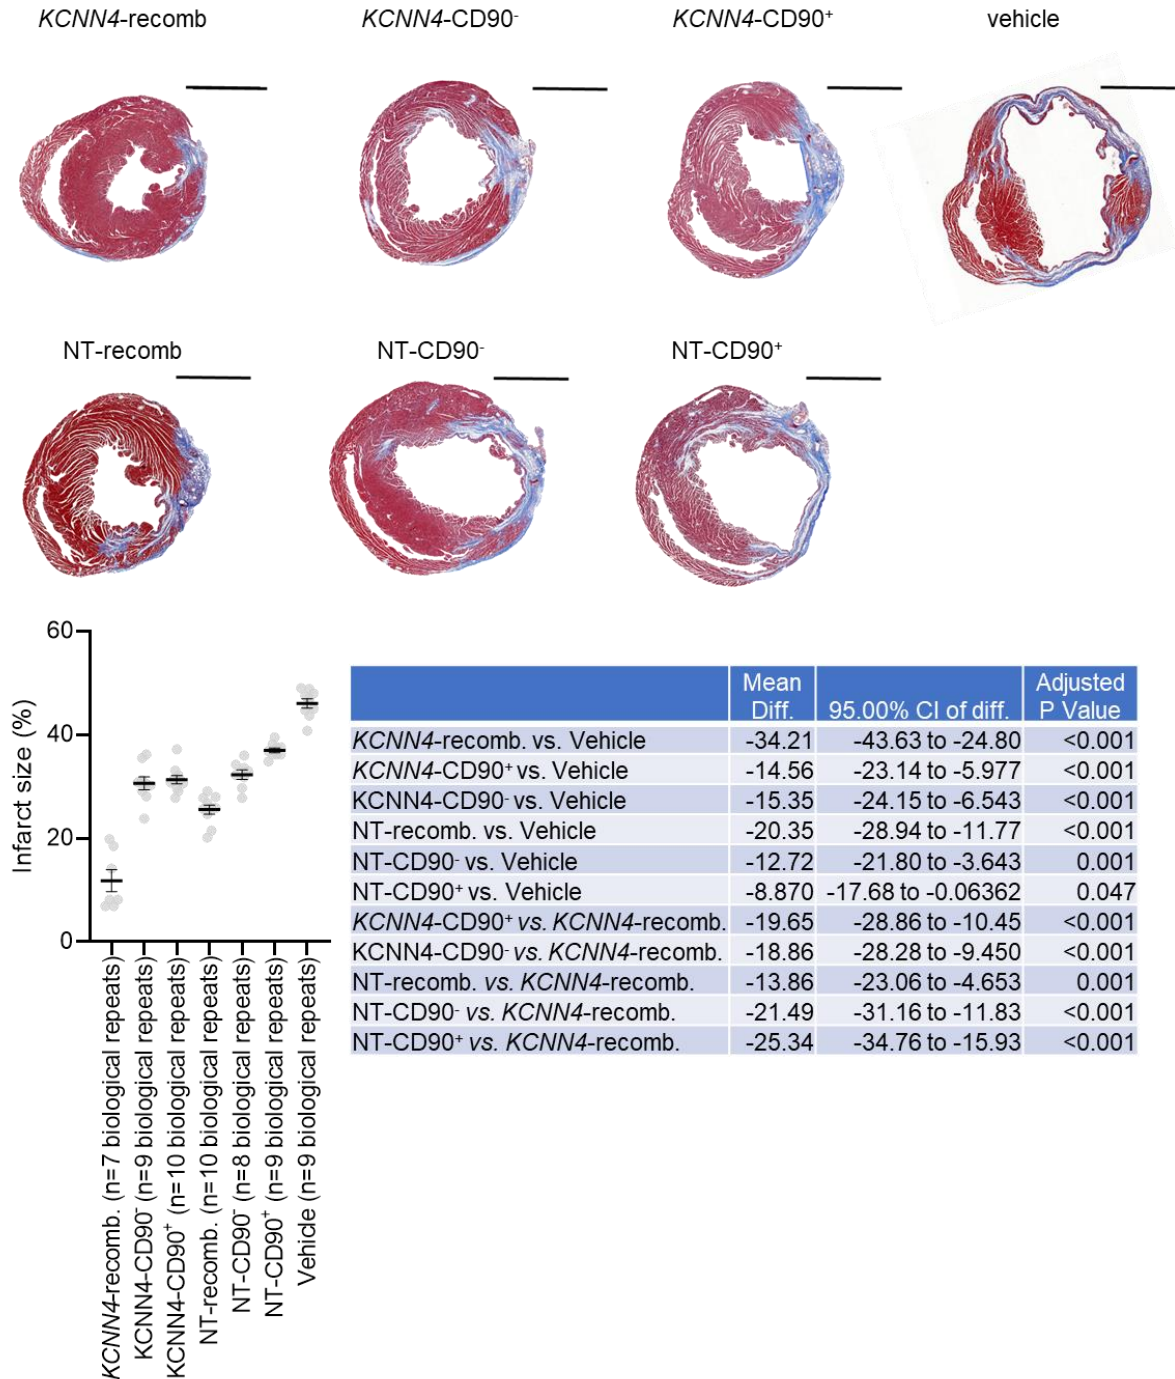

**Supplementary Fig. 19.** In vivo study exploring the impact of KCNN4 over-expression on EDC mediated repair. Representative images showing the effect of KCNN4 expression on Masson Trichrome stained sections. Scale bar, 2000  $\mu$ m. Quantitative data showing the effect of KCNN4 expression on scar size. Data are shown as individual points, along with mean and SEM. One-way ANOVA with individual-mean comparisons by Bonferroni multiple comparisons test.

**a**

### KCNN4-EDC vs NT-EDC

Downregulated

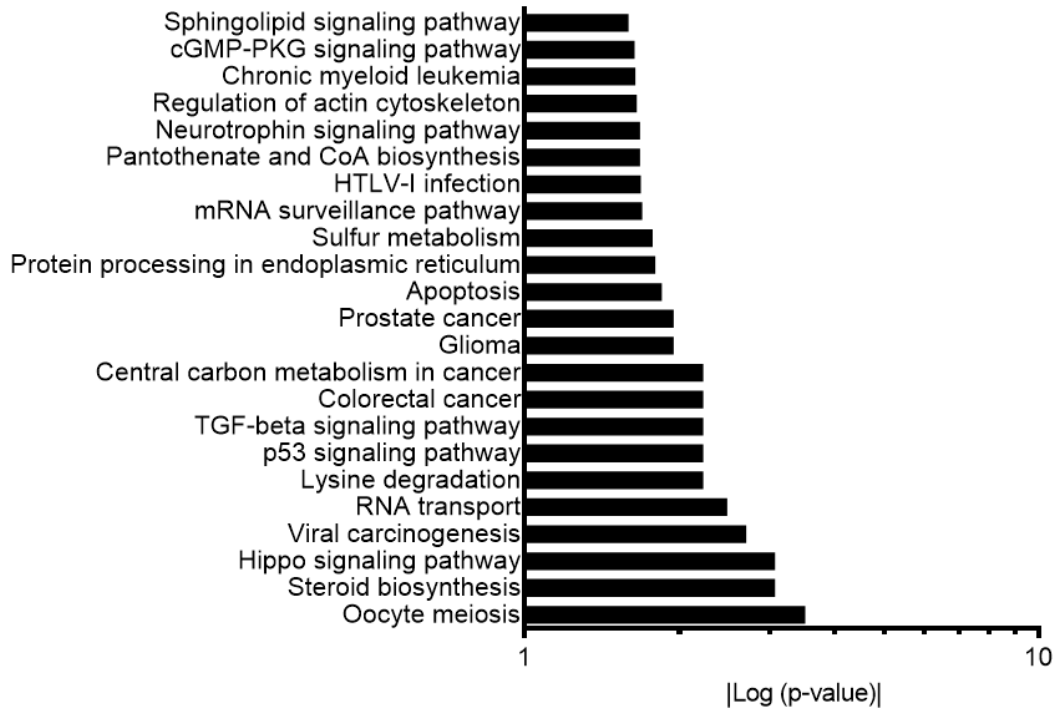

**b**

**KCNN4-EDC vs EV-EDC**

Upregulated

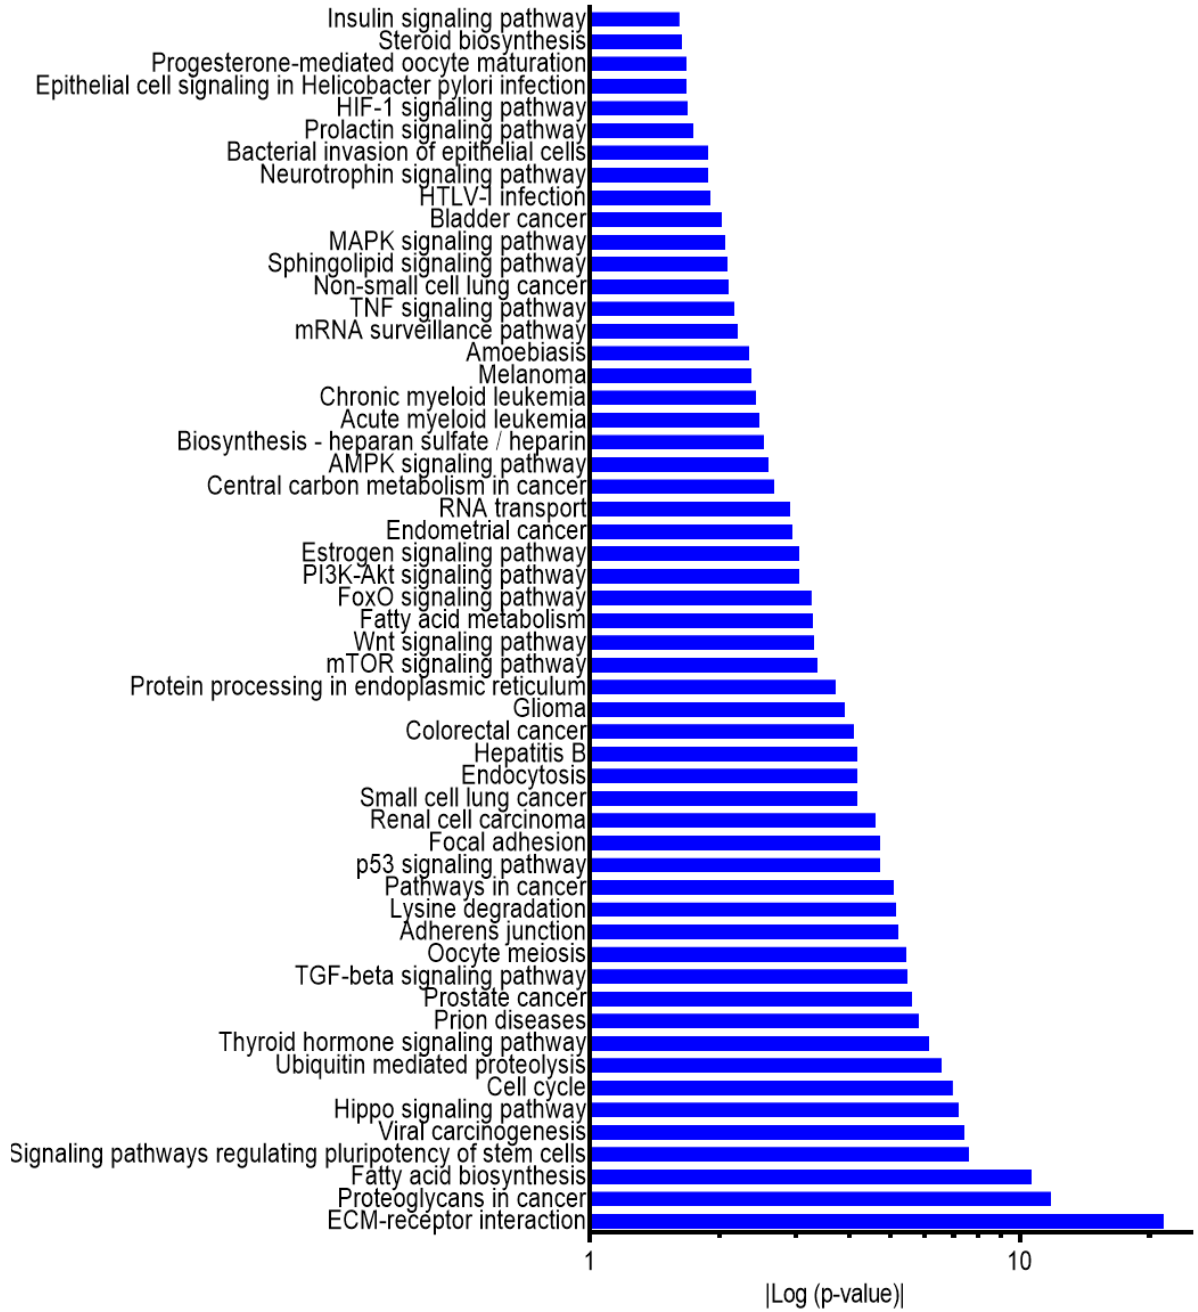



**c**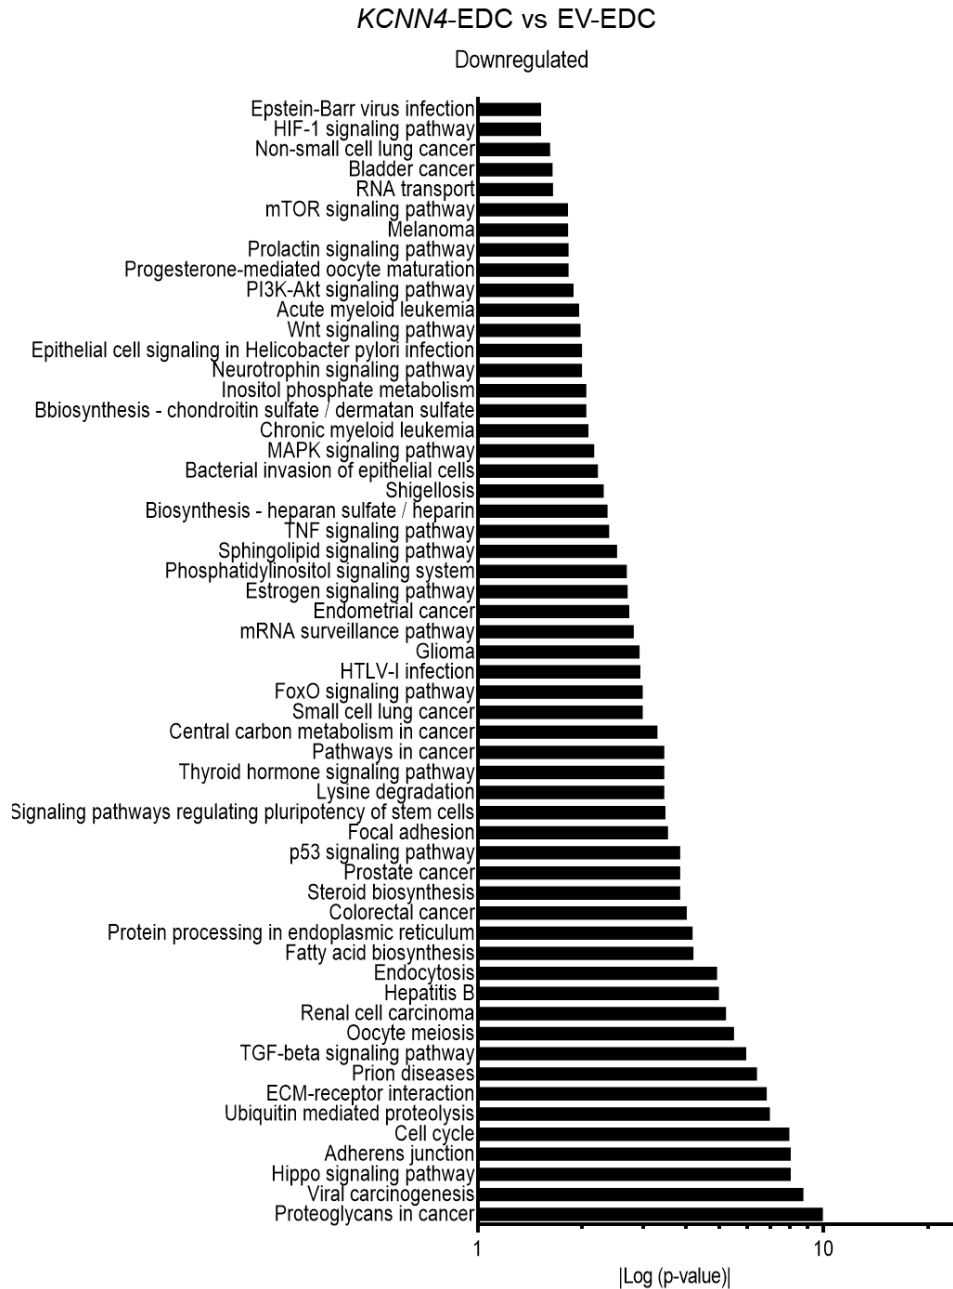

**Supplementary Fig. 20.** KEGG pathway analysis for molecular pathways predicted to be affected by miRNAs altered by *KCNN4* overexpression. Pathways associated with up- and down-regulated miRNAs in extracellular vesicles isolated from *KCNN4*-EDCs compared to **a.** NT-EDCs or **b, c.** EV-EDCs. For the comparison with NT-EDCs, only downregulated pathways were observed (as shown in **a.** For the comparison with EV-EDCs, both upregulated **b.** and downregulated **c.** pathways were noted. Online DIANA-TarBase tools were utilized to predict miRNA pathways based on experimentally validated miRNA interactions (DIANA-miRPath v3.0). Blue represents upregulated pathways, black downregulated. No pathways were upregulated in *KCNN4*-EDCs compared to NT-EDCs.

## SUPPLEMENTARY TABLES

**Supplementary Table 1.** Clinical characteristics of atrial appendage donors used to obtain EDCs.

|                                           | Atrial Appendage<br>donors<br><i>in vitro</i> study (n=8) | Atrial Appendage<br>donors<br><i>in vivo</i> study (n=4) | <i>P</i> value |
|-------------------------------------------|-----------------------------------------------------------|----------------------------------------------------------|----------------|
| Age (years)                               | 65±3                                                      | 68±4                                                     | 0.73           |
| Body Mass Index<br>(kg/m <sup>2</sup> )   | 30±3                                                      | 33±3                                                     | 0.58           |
| Gender (%male)                            | 75%                                                       | 50%                                                      | 0.54           |
| Diabetes                                  | 25%                                                       | 0%                                                       | 0.51           |
| Hypertension                              | 100%                                                      | 50%                                                      | 0.09           |
| Dyslipidemia                              | 63%                                                       | 50%                                                      | 1.00           |
| Ongoing smoking                           | 25%                                                       | 50%                                                      | 0.54           |
| Thyroid disease                           | 25%                                                       | 25%                                                      | 1.00           |
| Peripheral vascular<br>disease            | 13%                                                       | 25%                                                      | 1.00           |
| Coronary artery<br>disease                | 100%                                                      | 75%                                                      | 0.33           |
| History of<br>Myocardial<br>Infarction    | 38%                                                       | 25%                                                      | 1.00           |
| Valvular heart<br>disease                 | 50%                                                       | 50%                                                      | 1.00           |
| Congestive heart<br>failure               | 0%                                                        | 25%                                                      | 0.33           |
| NYHA class                                | 1.25±0.3                                                  | 2.7±0.9                                                  | 0.13           |
| Left ventricular<br>ejection fraction (%) | 53±7                                                      | 47±3                                                     | 0.52           |
| CCS class                                 | 1.8±0.7                                                   | 3±0.1                                                    | 0.37           |
| Creatinine (µmol/L)                       | 82±8                                                      | 76±8                                                     | 0.65           |
| Hemoglobin A1c                            | 5.8±0.2                                                   | 5.8±0.3                                                  | 1.00           |
| Medications:                              |                                                           |                                                          |                |
| Anti-platelet therapy                     | 100%                                                      | 100%                                                     | 1.00           |
| Beta-blocker                              | 88%                                                       | 50%                                                      | 0.23           |
| Statins                                   | 88%                                                       | 25%                                                      | 0.07           |
| ACEI or ARB                               | 88%                                                       | 50%                                                      | 0.23           |

NYHA = New York Heart Association; CCS = Canadian Cardiovascular Society; ACEI = Angiotensin-converting enzyme inhibitor; ARB = Angiotensin receptor blocker. P-values are based on 2-sided non-paired t-test (quantitative data) or Fisher's exact test (frequency data).

**Supplementary Table 2.** Echocardiographic measures of left ventricular function.

|                               |                           | LVEDV<br>( $\mu$ L) | LVESV( $\mu$ L) | Stroke<br>Volume<br>( $\mu$ L) | Ejection<br>Fraction<br>(%)     | Fractional<br>Area<br>Change (%) | Cardiac<br>Output<br>(mL/min) |
|-------------------------------|---------------------------|---------------------|-----------------|--------------------------------|---------------------------------|----------------------------------|-------------------------------|
| 1 week post-<br>LCA ligation  | <i>KCNN4</i> -EDCs (n=12) | 66.6 $\pm$ 1.8      | 44.2 $\pm$ 1.2  | 22.4 $\pm$ 0.8                 | 33.6 $\pm$ 0.7                  | 20.0 $\pm$ 0.5                   | 9.0 $\pm$ 0.9                 |
|                               | NT-EDCs (n=13)            | 76.8 $\pm$ 4.9      | 51.4 $\pm$ 3.5  | 25.4 $\pm$ 1.6                 | 33.3 $\pm$ 1.0                  | 20.1 $\pm$ 0.6                   | 9.8 $\pm$ 1.0                 |
|                               | EV-EDCs (n=12)            | 73.9 $\pm$ 6.7      | 50.8 $\pm$ 4.6  | 23.1 $\pm$ 2.3                 | 31.3 $\pm$ 1.1                  | 18.4 $\pm$ 0.7                   | 8.6 $\pm$ 0.9                 |
|                               | Vehicle (n=14)            | 69.5 $\pm$ 4.7      | 46.9 $\pm$ 3.4  | 22.6 $\pm$ 1.4                 | 32.8 $\pm$ 0.6                  | 20.3 $\pm$ 0.6                   | 8.2 $\pm$ 0.6                 |
| 4 weeks post-<br>LCA ligation | <i>KCNN4</i> -EDCs (n=12) | 73.8 $\pm$ 3.8      | 42.9 $\pm$ 3.1  | 30.9 $\pm$ 1.3 <sup>‡</sup>    | 42.7 $\pm$ 2.2 <sup>*,†,‡</sup> | 26.8 $\pm$ 1.6 <sup>†,‡</sup>    | 11.2 $\pm$ 0.4 <sup>‡</sup>   |
|                               | NT-EDCs (n=13)            | 95.6 $\pm$ 8.3      | 60.1 $\pm$ 5.6  | 35.5 $\pm$ 2.9 <sup>‡</sup>    | 37.6 $\pm$ 0.9 <sup>‡</sup>     | 23.4 $\pm$ 0.6 <sup>‡</sup>      | 12.4 $\pm$ 0.9 <sup>‡</sup>   |
|                               | EV-EDCs (n=12)            | 93.7 $\pm$ 8.4      | 59.9 $\pm$ 6.1  | 33.7 $\pm$ 2.5 <sup>‡</sup>    | 36.6 $\pm$ 1.0 <sup>‡</sup>     | 22.4 $\pm$ 0.5 <sup>‡</sup>      | 11.9 $\pm$ 0.6 <sup>‡</sup>   |
|                               | Vehicle (n=14)            | 76.0 $\pm$ 4.4      | 55.4 $\pm$ 3.4  | 20.7 $\pm$ 1.2                 | 27.3 $\pm$ 0.6                  | 17.4 $\pm$ 0.8                   | 7.3 $\pm$ 0.5                 |

EDC = explant-derived cell; EV = empty vector; LCA = left coronary artery; LVEDV = left ventricular end diastolic volume; LVESV = left ventricular end systolic volume; NT = non treated.

\*  $P < 0.05$  vs. EV-EDCs, †  $P < 0.05$  vs. NT-EDCs, ‡  $P < 0.05$  vs. vehicle. Statistics are by one-way ANOVA followed by Bonferroni multiple comparisons test.

**Supplementary Table 3.** Invasive hemodynamic measures of left ventricular function.

|                           | Pmin<br>(mmHg)       | Pmean<br>(mmHg)       | Pdev<br>(mmHg)            | Pes<br>(mmHg)           | Ped<br>(mmHg)        | HR<br>(bpm) | Ea<br>(mmHg/uL) | dP/dt max<br>(mmHg/s)     |
|---------------------------|----------------------|-----------------------|---------------------------|-------------------------|----------------------|-------------|-----------------|---------------------------|
| <i>KCNN4</i> -EDCs (n=11) | 4.0±0.6 <sup>‡</sup> | 39.2±1.9 <sup>‡</sup> | 84.2±2.4 <sup>*,†,‡</sup> | 82.5±2.6 <sup>*,‡</sup> | 9.5±0.9 <sup>‡</sup> | 557±8       | 5.3±0.3         | 7934±198 <sup>*,†,‡</sup> |
| NT-EDCs (n=13)            | 2.5±0.6              | 34.3±1.4 <sup>‡</sup> | 75.4±2.0 <sup>‡</sup>     | 71.3±3.0                | 7.3±0.9              | 557±11      | 4.5±0.3         | 6542±356 <sup>‡</sup>     |
| EV-EDCs (n=10)            | 3.8±0.7              | 36.1±2.1 <sup>‡</sup> | 75.2±1.1 <sup>‡</sup>     | 76.6±1.8 <sup>‡</sup>   | 7.6±1.2              | 575±9       | 5.2±0.4         | 6518±196 <sup>‡</sup>     |
| Vehicle (n=10)            | 1.6±0.3              | 24.8±1.3              | 66.5±1.2                  | 65.0±1.2                | 4.0±0.5              | 561±11      | 5.5±0.7         | 5674±166                  |

  

|                           | dP/dt min<br>(mmHg/s)      | dV/dt max<br>(uL/s) | dV/dt min<br>(uL/s) | P@dV/dt max<br>(mmHg) | P@dP/dt max<br>(mmHg)   | V@dP/dt<br>max (uL) | V@dP/dt<br>min (uL) |
|---------------------------|----------------------------|---------------------|---------------------|-----------------------|-------------------------|---------------------|---------------------|
| <i>KCNN4</i> -EDCs (n=11) | -6629±282 <sup>*,†,‡</sup> | 758±40              | -796±52             | 12.9±3.1              | 54.3±1.7 <sup>*,‡</sup> | 32.5±3.9            | 18.0±3.2            |
| NT-EDCs (n=13)            | -5437±369                  | 766±85              | -893±68             | 12.9±5.3              | 45.1±2.2 <sup>‡</sup>   | 33.1±4.0            | 18.8±3.8            |
| EV-EDCs (n=10)            | -5443±144                  | 745±64              | -846±95             | 12.7±2.9              | 47.9±2.0 <sup>‡</sup>   | 36.8±3.6            | 23.3±3.2            |
| Vehicle (=10)             | -4816±107                  | 745±146             | -826±151            | 8.7±3.4               | 36.1±0.8                | 34.1±3.5            | 22.8±2.7            |

  

|                           | SW<br>(mmHg*uL)      | CO<br>(uL/min) | SV<br>(uL) | Vmax<br>(uL) | Vmin<br>(uL) | Ves<br>(uL) | Ved<br>(uL) | Pmax<br>(mmHg)            |
|---------------------------|----------------------|----------------|------------|--------------|--------------|-------------|-------------|---------------------------|
| <i>KCNN4</i> -EDCs (n=11) | 1144±79 <sup>‡</sup> | 9472±556       | 16.6±1.0   | 35.6±3.8     | 17.2±3.2     | 19.2±3.3    | 31.5±3.5    | 88.2±2.2 <sup>*,†,‡</sup> |
| NT-EDCs (n=13)            | 997±76               | 9445±692       | 17.0±1.2   | 35.0±3.9     | 18.0±3.7     | 19.6±3.8    | 32.8±4.0    | 77.8±1.9 <sup>‡</sup>     |
| EV-EDCs (n=10)            | 981±113              | 9473±908       | 16.6±1.7   | 34.4±4.1     | 22.3±3.1     | 24.8±3.3    | 37.0±3.6    | 80.7±1.6 <sup>‡</sup>     |
| Vehicle (n=10)            | 713±92               | 8033±1024      | 14.4±1.9   | 36.4±3.5     | 22.1±2.7     | 24.6±2.7    | 33.9±2.9    | 68.0±1.3                  |

  

|                           | PVA<br>(mmHg/uL) | PE<br>(mmHg/uL) | CE      |
|---------------------------|------------------|-----------------|---------|
| <i>KCNN4</i> -EDCs (n=13) | 2092±213         | 949±183         | 0.8±0.2 |
| NT-EDCs (n=13)            | 1980±271         | 789±162         | 0.6±0.1 |
| EV-EDCs (n=10)            | 1757±229         | 801±198         | 0.6±0.1 |
| Vehicle (=10)             | 1308±177         | 595±112         | 0.4±0.1 |

CE = cardiac efficiency; CO = cardiac output; dP/dtmax = maximum derivative of pressure; dP/dtmin = minimum derivative of pressure; dV/dtmax = maximum derivative of volume; dV/dtmin = minimum derivative of volume; Ea = arterial elastance; EDC = explant-derived cell; EV = empty vector; HR = heart rate; NT = non treated; P@dP/dtmax = pressure at maximum derivative of pressure;

P@dV/dtmax = pressure at maximum derivative of volume; Ped = end diastolic pressure; Pes = end systolic pressure; Pmax = maximum pressure; Pmean = mean pressure; Pmin = minimum pressure; PVA = pressure-volume area; PE = potential energy; SV = stroke volume; SW = stroke work; TAU = isovolumic relaxation constant; V@dP/dtmax = volume at maximum derivative of pressure; V@dP/dtmin = volume at minimum derivative of pressure; Ved = end diastolic volume; Ves = end systolic volume; Vmax = maximum volume; Vmin = minimum volume. \*  $P < 0.05$  vs. EV-EDCs, †  $P < 0.05$  vs. NT-EDCs, ‡  $P < 0.05$  vs. vehicle. One-way ANOVA followed by Bonferroni multiple comparisons test.

**Supplementary Table 4.** Echocardiographic measures of left ventricular function examining the long-term durability of cell transplantation on heart function.

| Weeks post LCA ligation |                          | LVEDV (μL) | LVESV(μL)                | Stroke Volume (μL)    | Ejection Fraction (%)    | Fractional Area Change (%) | Cardiac Output (mL/min) |
|-------------------------|--------------------------|------------|--------------------------|-----------------------|--------------------------|----------------------------|-------------------------|
| Week 1                  | <i>KCNN4</i> -EDCs (n=7) | 73.8±8.8   | 48.5±5.8                 | 25.2±3.0              | 34.2±0.6                 | 20.0±1.0                   | 9.3±1.2                 |
|                         | NT-EDCs (n=7)            | 77.1±6.3   | 52.1±4.5                 | 25.0±1.9              | 32.6±1.5                 | 20.0±0.5                   | 9.4±0.9                 |
|                         | EV-EDCs (n=10)           | 78.0±5.2   | 53.8±3.5                 | 24.1±1.9              | 30.8±1.3                 | 19.8±0.6                   | 8.6±0.7                 |
|                         | Vehicle (n=7)            | 70.9±4.8   | 48.0±3.3                 | 23.0±1.6              | 32.3±1.0                 | 20.1±0.8                   | 8.4±0.7                 |
| Week 4                  | <i>KCNN4</i> -EDCs (n=7) | 62.6±5.0   | 33.4±3.0 <sup>†, *</sup> | 29.2±2.2 <sup>*</sup> | 46.8±2.9 <sup>†, *</sup> | 29.0±1.6 <sup>†, *</sup>   | 10.6±0.3                |
|                         | NT-EDCs (n=7)            | 90.1±9.4   | 57.9±6.6                 | 32.2±3.0 <sup>*</sup> | 36.2±1.3 <sup>*</sup>    | 22.3±0.5 <sup>*</sup>      | 11.5±0.6                |
|                         | EV-EDCs (n=10)           | 73.5±6.7   | 47.1±4.4                 | 26.4±2.9 <sup>*</sup> | 35.8±3.0 <sup>*</sup>    | 21.7±0.6 <sup>*</sup>      | 9.1±1.1                 |
|                         | Vehicle (n=7)            | 78.2±6.6   | 57.2±4.9                 | 21.0±1.9              | 26.8±1.0                 | 16.1±0.8                   | 8.2±0.8                 |
| Week 8                  | <i>KCNN4</i> -EDCs (n=7) | 65.1±9.3   | 33.9±6.9                 | 31.2±2.7              | 49.6±2.2 <sup>†, *</sup> | 31.1±3.4 <sup>†, *</sup>   | 11.6±1.1                |
|                         | NT-EDCs (n=7)            | 80.5±2.0   | 48.5±7.6                 | 32.0±4.4              | 39.9±1.1 <sup>*</sup>    | 24.4±1.2 <sup>*</sup>      | 11.7±1.4                |
|                         | EV-EDCs (n=10)           | 69.9±4.1   | 42.7±7.6                 | 27.2±4.4              | 38.8±1.8 <sup>*</sup>    | 22.9±1.2 <sup>*</sup>      | 11.6±1.4                |
|                         | Vehicle (n=7)            | 80.7±5.9   | 61.5±2.2                 | 19.2±3.7              | 23.9±1.6                 | 14.5±0.1                   | 7.0±1.4                 |

EDC = explant-derived cell; LVEDV = left ventricular end diastolic volume; LVESV = left ventricular end systolic volume; NT = non treated. \* $P < 0.05$  vs. vehicle treated mice, <sup>†</sup> $P < 0.05$  vs. EV- or NT-EDCs treated mice. One-way and two-way ANOVA with individual-mean comparisons by Bonferroni multiple comparisons test for each time point.

**Supplementary Table 5.** Echocardiographic measures of left ventricular function examining the effect of cell injection on normal heart function.

|        |                           | LVEDV<br>( $\mu$ L) | LVESV( $\mu$ L) | Stroke<br>Volume<br>( $\mu$ L) | Ejection<br>Fraction<br>(%) | Fractional<br>Area<br>Change (%) | Cardiac<br>Output<br>(mL/min) |
|--------|---------------------------|---------------------|-----------------|--------------------------------|-----------------------------|----------------------------------|-------------------------------|
| Day 0  | <i>KCNN4</i> -EDCs (n=10) | 65.0 $\pm$ 2.8      | 24.1 $\pm$ 1.0  | 40.9 $\pm$ 2.4                 | 62.6 $\pm$ 1.8              | 18.3 $\pm$ 1.8                   | 17.2 $\pm$ 1.4                |
|        | NT-EDCs (n=10)            | 59.8 $\pm$ 2.2      | 21.6 $\pm$ 1.1  | 38.2 $\pm$ 1.5                 | 63.9 $\pm$ 1.0              | 15.9 $\pm$ 1.0                   | 16.4 $\pm$ 1.1                |
| Day 28 | <i>KCNN4</i> -EDCs (n=10) | 68.4 $\pm$ 3.2      | 25.0 $\pm$ 1.0  | 43.4 $\pm$ 2.8                 | 63.1 $\pm$ 1.4              | 16.0 $\pm$ 1.0                   | 21.4 $\pm$ 1.6                |
|        | NT-EDCs (n=10)            | 65.0 $\pm$ 3.2      | 25.8 $\pm$ 1.2  | 39.1 $\pm$ 2.5                 | 59.9 $\pm$ 1.5              | 13.8 $\pm$ 0.8                   | 18.0 $\pm$ 1.6                |

EDC = explant-derived cell; LVEDV = left ventricular end diastolic volume; LVESV = left ventricular end systolic volume; NT = non treated.

**Supplementary Table 6.** Effect of *KCNN4* overexpression on electrophysiological parameters.

|                    | RR<br>(ms) | PR<br>(ms) | QRS<br>(ms) | QT<br>(ms) | QTc<br>(ms) |
|--------------------|------------|------------|-------------|------------|-------------|
| <i>KCNN4</i> -EDCs | 165±3      | 51±3       | 27±2        | 85±2       | 209±6       |
| NT-EDCs            | 174±12     | 56±2       | 31±2        | 90±5       | 217±10      |
| EV-EDCs            | 157±3      | 51±2       | 24±2        | 82±2       | 208±5       |
| Vehicle            | 168±5      | 47±3       | 30±2        | 94±5       | 228±9       |

EDC = explant-derived cell; EV = empty vector; NT = non-transduced.



**Supplementary Table 7.** Echocardiographic measures of left ventricular function examining the impact of KCNN4 over-expression on EDC mediated repair.

|                             |                                       | LVEDV<br>( $\mu$ L) | LVESV( $\mu$ L) | Stroke<br>Volume<br>( $\mu$ L) | Ejection<br>Fraction<br>(%)    | Fractional<br>Area<br>Change (%) | Cardiac<br>Output<br>(mL/min) |
|-----------------------------|---------------------------------------|---------------------|-----------------|--------------------------------|--------------------------------|----------------------------------|-------------------------------|
| 1 week post<br>LCA ligation | <i>KCNN4</i> -recomb. (n=7)           | 71.1 $\pm$ 5.8      | 46.7 $\pm$ 3.9  | 24.4 $\pm$ 2.0                 | 34.3 $\pm$ 0.6                 | 19.9 $\pm$ 0.7                   | 8.7 $\pm$ 0.8                 |
|                             | <i>KCNN4</i> -CD90 <sup>-</sup> (n=9) | 69.0 $\pm$ 5.7      | 48.0 $\pm$ 4.3  | 20.9 $\pm$ 1.6                 | 30.3 $\pm$ 3.5                 | 17.9 $\pm$ 0.7                   | 7.9 $\pm$ 0.6                 |
|                             | <i>KCNN4</i> -CD90 <sup>+</sup> (10)  | 82.8 $\pm$ 9.6      | 57.2 $\pm$ 6.4  | 24.5 $\pm$ 3.6                 | 29.6 $\pm$ 1.5                 | 17.8 $\pm$ 1.2                   | 9.6 $\pm$ 1.5                 |
|                             | NT-recomb. (n=10)                     | 70.5 $\pm$ 2.9      | 47.2 $\pm$ 1.9  | 23.3 $\pm$ 1.2                 | 33.0 $\pm$ 3.7                 | 20.7 $\pm$ 0.8                   | 5.6 $\pm$ 0.3                 |
|                             | NT-CD90 <sup>-</sup> (n=8)            | 80.1 $\pm$ 7.8      | 53.8 $\pm$ 5.4  | 26.3 $\pm$ 2.5                 | 32.8 $\pm$ 2.7                 | 21.2 $\pm$ 0.6                   | 8.8 $\pm$ 1.0                 |
|                             | NT-CD90 <sup>+</sup> (n=9)            | 69.9 $\pm$ 6.4      | 47.9 $\pm$ 4.7  | 22.0 $\pm$ 1.8                 | 31.5 $\pm$ 1.2                 | 19.4 $\pm$ 0.7                   | 8.3 $\pm$ 0.6                 |
|                             | PBS (n=9)                             | 92.2 $\pm$ 11.1     | 61.4 $\pm$ 7.4  | 30.8 $\pm$ 3.7                 | 33.4 $\pm$ 2.6                 | 20.4 $\pm$ 0.5                   | 10.8 $\pm$ 1.2                |
| Day 28 post<br>LCA ligation | <i>KCNN4</i> -recomb. (n=7)           | 77.3 $\pm$ 7.6      | 42.6 $\pm$ 5.8  | 34.6 $\pm$ 1.9 <sup>‡</sup>    | 46.5 $\pm$ 3.0 <sup>‡</sup>    | 29.2 $\pm$ 2.6 <sup>‡</sup>      | 12.2 $\pm$ 0.7 <sup>‡</sup>   |
|                             | <i>KCNN4</i> -CD90 <sup>-</sup> (n=9) | 76.5 $\pm$ 6.7      | 46.8 $\pm$ 4.0  | 29.7 $\pm$ 2.8 <sup>‡</sup>    | 38.8 $\pm$ 1.4 <sup>‡</sup>    | 23.4 $\pm$ 0.8 <sup>*, ‡</sup>   | 11.2 $\pm$ 0.6 <sup>‡</sup>   |
|                             | <i>KCNN4</i> -CD90 <sup>+</sup> (10)  | 72.2 $\pm$ 9.5      | 46.1 $\pm$ 5.6  | 26.1 $\pm$ 3.9                 | 35.7 $\pm$ 1.4 <sup>*, ‡</sup> | 21.0 $\pm$ 1.0 <sup>*, ‡</sup>   | 9.2 $\pm$ 1.5                 |
|                             | NT-recomb. (n=10)                     | 82.5 $\pm$ 7.6      | 51.6 $\pm$ 4.7  | 30.9 $\pm$ 3.0 <sup>‡</sup>    | 37.3 $\pm$ 3.2 <sup>‡</sup>    | 22.9 $\pm$ 0.9 <sup>*, ‡</sup>   | 10.8 $\pm$ 0.9 <sup>‡</sup>   |
|                             | NT-CD90 <sup>-</sup> (n=8)            | 98.5 $\pm$ 5.0      | 63.7 $\pm$ 1.0  | 34.8 $\pm$ 4.0 <sup>‡</sup>    | 35.6 $\pm$ 2.0 <sup>*, ‡</sup> | 23.1 $\pm$ 1.7 <sup>*, ‡</sup>   | 11.9 $\pm$ 0.7 <sup>‡</sup>   |
|                             | NT-CD90 <sup>+</sup> (n=9)            | 76.7 $\pm$ 5.9      | 51.4 $\pm$ 4.2  | 25.3 $\pm$ 1.8                 | 33.1 $\pm$ 1.7 <sup>*</sup>    | 20.1 $\pm$ 0.7 <sup>*, ‡</sup>   | 9.3 $\pm$ 0.7                 |
|                             | PBS (n=9)                             | 73.9 $\pm$ 7.8      | 55.5 $\pm$ 6.0  | 18.4 $\pm$ 1.9                 | 24.9 $\pm$ 2.5                 | 14.5 $\pm$ 0.4                   | 6.7 $\pm$ 0.7                 |

LVEDV = left ventricular end diastolic volume; LVESV = left ventricular end systolic volume; NT = non treated.

\*  $P < 0.05$  vs. *KCNN4*-recomb., ‡  $P < 0.05$  vs. vehicle.

One-way ANOVA with individual-mean comparisons by Bonferroni multiple comparisons test.

**Supplementary Table 8.** Top 10 miRNAs within adherent explant-derived cell extracellular vesicles involved with cardiomyocyte proliferation, salvage, and modulating cardiac fibrosis.

| Name              | Biological role                                                                  |
|-------------------|----------------------------------------------------------------------------------|
| miR-199a          | Promotes cardiomyocyte proliferation <sup>1</sup>                                |
| miR-93            | Protects against ischemia-reperfusion injury <sup>2</sup>                        |
| miR-23a           | Promotes cardiomyocyte proliferation <sup>3</sup>                                |
| miR-125b          | Protects cardiomyocytes against p53 mediated apoptosis <sup>4</sup>              |
| miR-199a+miR-199b | Promotes cardiomyocyte proliferation <sup>5</sup>                                |
| miR-21            | Protects cardiomyocyte from oxidative stress <sup>6</sup>                        |
| miR-22            | Regulates cardiac tissue fibrosis <sup>7</sup>                                   |
| miR-495           | Promotes cardiomyocyte proliferation <sup>8</sup>                                |
| miR-873           | Inhibits RIPK1/RIPK3-mediated necrotic cell death in cardiomyocytes <sup>9</sup> |
| let-7b            | Protects transplanted mesenchymal stem cells from apoptosis <sup>10</sup>        |

**Supplementary Table 9.** Effect of *KCNN4* overexpression on the miRNA profile within extracellular vesicles compared to non-transduced explant-derived cells.

| Name                 | <i>P</i> -adjusted | <i>P</i> -value | Log2<br>(Fold change) |
|----------------------|--------------------|-----------------|-----------------------|
| Downregulated miRNAs |                    |                 |                       |
| miR-1246             | 0.001392           | 1.02E-05        | -6.02242              |
| miR-4531             | 0.004192           | 9.25E-05        | -5.0545               |
| miR-548n             | 0.003996           | 5.88E-05        | -5.26002              |
| miR-603              | 0.006064           | 0.000178        | -4.76565              |

**Supplementary Table 10.** Effect of *KCNN4* overexpression on the miRNA profile within extracellular vesicles compared to empty vector explant-derived cells.

| Name                 | <i>P</i> -adjusted | <i>P</i> -value | Log2<br>(Fold change) |
|----------------------|--------------------|-----------------|-----------------------|
| Upregulated miRNAs   |                    |                 |                       |
| let-7a               | 7.18E-05           | 5.28E-07        | 7.117411              |
| miR-100              | 0.044937           | 0.003896        | 2.640891              |
| miR-199b             | 0.009134           | 0.000269        | 2.600605              |
| miR-191              | 0.016288           | 0.000637        | 3.028148              |
| miR-181a             | 0.005024           | 0.000111        | 3.033296              |
| miR-21               | 0.040347           | 0.0027          | 2.603005              |
| miR-22               | 0.016288           | 0.000719        | 2.630868              |
| miR-25               | 0.023237           | 0.001196        | 2.517763              |
| miR-15b              | 0.040347           | 0.002967        | 2.307322              |
| miR-93               | 0.047076           | 0.005538        | 2.935141              |
| miR-99a              | 0.036286           | 0.002134        | 2.370586              |
| miR-15a              | 0.044937           | 0.004436        | 2.222103              |
| miR-29b              | 0.044937           | 0.004626        | 2.417488              |
| Downregulated miRNAs |                    |                 |                       |
| miR-144              | 0.044973           | 0.00496         | -3.26627              |
| miR-182              | 0.044937           | 0.003966        | -3.51073              |
| miR-451a             | 0.000382           | 5.61E-06        | -5.79156              |

**Supplementary Table 11.** List of primers used.

| Transcript   | Primer Sequence                                                                                                                                             |
|--------------|-------------------------------------------------------------------------------------------------------------------------------------------------------------|
| <b>ALU</b>   | <i>Fw</i> 5'-CAT GGT GAA ACC CCG TCT CTA-3'<br><i>Rv</i> 5'-GCC TCA GCC TCC CGA GTA G-3'<br><i>Pr</i> 5'-/56-FAM/ATT AGC CGG/ZEN/GCG TGG TGG CG/3IABkFQ/-3' |
| <b>GAPDH</b> | <i>Fw</i> 5'-CAA CTG CTT AGC ACC CCT GG-3'<br><i>Rv</i> 5'-GGC CAT CCA CAG TCT TCT GG-3'                                                                    |
| <b>KCNN4</b> | <i>Fw</i> 5'- TAA AGC TTG GCC ACG AAC CA-3'<br><i>Rv</i> 5'- TCC TGC TCA ACG CTT CCT AC-3'                                                                  |

*Fw*: Forward Primer

*Rv*: Reverse Primer

*Pr*: Probe

## SUPPLEMENTARY REFERENCES

1. Eulalio, A., et al. Functional Screening Identifies Mirnas Inducing Cardiac Regeneration. *Nature* **492**, 376-381 (2012).
2. Ke, Z.P., Xu, P., Shi, Y., Gao, A.M. MicroRNA-93 Inhibits Ischemia-Reperfusion Induced Cardiomyocyte Apoptosis by Targeting Pten. *Oncotarget* **7**, 28796-28805 (2016).
3. Pandey, R., Yang, Y., Jackson, L., Ahmed, R.P. MicroRNAs Regulating Meis1 Expression and Inducing Cardiomyocyte Proliferation. *Cardiovasc. Regen Med* **3**, e1468 (2016).
4. Wang, X., et al. MicroRNA-125b Protects against Myocardial Ischaemia/Reperfusion Injury Via Targeting P53-Mediated Apoptotic Signalling and TRAF6. *Cardiovasc. Res.* **102**, 385-395 (2014).
5. Lesizza, P., Prosdocimo, G., Martinelli, V., Sinagra, G., Zacchigna, S., Giacca, M. Single-Dose Intracardiac Injection of Pro-Regenerative MicroRNAs Improves Cardiac Function after Myocardial Infarction. *Circ. Res.* **120**, 1298-1304 (2017).
6. Xiao, J., et al. Cardiac Progenitor Cell-Derived Exosomes Prevent Cardiomyocytes Apoptosis through Exosomal Mir-21 by Targeting PDCD4. *Cell Death Dis.* **7**, e2277 (2016).
7. Hong, Y., et al. Mir-22 May Suppress Fibrogenesis by Targeting TGFbetaR I in Cardiac Fibroblasts. *Cell. Physiol. Biochem.* **40**, 1345-1353 (2016).
8. Clark, A.L., Naya, F.J. MicroRNAs in the Myocyte Enhancer Factor 2 (MEF2)-regulated Gtl2-Dio3 Noncoding RNA Locus Promote Cardiomyocyte Proliferation by Targeting the Transcriptional Coactivator Cited2. *J. Biol. Chem.* **290**, 23162-23172 (2015).
9. Wang, K., et al. The Long Noncoding Rna NRF Regulates Programmed Necrosis and Myocardial Injury During Ischemia and Reperfusion by Targeting Mir-873. *Cell Death Differ.* **23**, 1394-1405 (2016).
10. Cheng, J., Zhang, P., Jiang, H. Let-7b-Mediated Pro-Survival of Transplanted Mesenchymal Stem Cells for Cardiac Regeneration. *Stem Cell Res. Ther.* **6**, 216 (2015).
